# Supplementary material for: Rubinstein-Taybi Syndrome: A Model of Epigenetic Disorder
Source: MDPI journal article supplement (doi:10.3390/genes12070968), 2021-06-24
Supplement: s1 [file s1]

**Table S1: All of 445 CREBBP mutations causing Rubinstein-Taybi syndrome type 1 listed in HGMDPro variant database and reported in the literature (called the 04/27/2021)**

| Missense/nonsense: 152 mutations |               |                                                                                                                                                                                |
|----------------------------------|---------------|--------------------------------------------------------------------------------------------------------------------------------------------------------------------------------|
| Nucleotide                       | Protein       | Reference                                                                                                                                                                      |
| c.40A>G                          | p.(Arg14Gly)  | <a href="#">Bentivegna (2006) BMC Med Genet 7, 77</a>                                                                                                                          |
| c.68C>A                          | p.(Ser23*)    | <a href="#">Coupry (2002) J Med Genet 39, 415</a>                                                                                                                              |
| c.223C>T                         | p.(Arg75*)    | <a href="#">Spena (2015) Clin Genet 88, 431</a><br><a href="#">Kosaki (2020) Am J Med Genet A 182: 1601</a>                                                                    |
| c.304C>T                         | p.(Gln102*)   | <a href="#">Roelfsema (2005) Am J Hum Genet 76, 572</a>                                                                                                                        |
| c.376G>T                         | p.(Gly126*)   | <a href="#">Cross (2020) Am J Med Genet A 182, 2508</a>                                                                                                                        |
| c.406C>T                         | p.(Gln136*)   | <a href="#">Petrij (1995) Nature 376, 348</a>                                                                                                                                  |
| c.472C>T                         | p.(Gln158*)   | <a href="#">Spena (2015) Clin Genet 88, 431</a>                                                                                                                                |
| c.547C>T                         | p.(Gln183*)   | <a href="#">Spena (2015) Clin Genet 88, 431</a>                                                                                                                                |
| c.613C>T                         | p.(Gln205*)   | <a href="#">Cross (2020) Am J Med Genet A 182, 2508</a>                                                                                                                        |
| c.778C>T                         | p.(Gln260*)   | <a href="#">Balci (2010) Am J Med Genet A 152A, 1036</a>                                                                                                                       |
| c.992C>G                         | p.(Ser331*)   | <a href="#">Pérez-Grijalba (2019) Mol Genet Genomic Med 7,</a>                                                                                                                 |
| c.997G>T                         | p.(Gly333*)   | <a href="#">Cross (2020) Am J Med Genet A 182, 2508</a>                                                                                                                        |
| c.1066C>T                        | p.(Gln356*)   | <a href="#">Kamenarova (2016) Hum Pathol 47, 144</a>                                                                                                                           |
| c.1069C>T                        | p.(Gln357*)   | <a href="#">Petrij (1995) Nature 376, 348</a><br><a href="#">Xiong (2015) Science 347: 1254806</a><br><a href="#">Cross (2020) Am J Med Genet A 182: 2508</a>                  |
| c.1108C>T                        | p.(Arg370*)   | <a href="#">Coupry (2002) J Med Genet 39, 415</a><br><a href="#">Xiong (2015) Science 347: 1254806</a><br><a href="#">Cross (2020) Am J Med Genet A 182: 2508</a>              |
| c.1156C>T                        | p.(Arg386*)   | <a href="#">Cross (2020) Am J Med Genet A 182, 2508</a>                                                                                                                        |
| c.1217T>G                        | p.(Val406Gly) | <a href="#">Sharma (2010) J Biosci 35, 187</a>                                                                                                                                 |
| c.1237C>T                        | p.(Arg413*)   | <a href="#">Coupry (2002) J Med Genet 39, 415</a><br><a href="#">Xiong (2015) Science 347: 1254806</a><br><a href="#">Cross (2020) Am J Med Genet A 182: 2508</a>              |
| c.1270C>T                        | p.(Arg424*)   | <a href="#">Bartsch (2005) Hum Genet 117, 485</a><br><a href="#">Xiong (2015) Science 347: 1254806</a><br><a href="#">Cross (2020) Am J Med Genet A 182: 2508</a>              |
| c.1279T>G                        | p.(Cys427Gly) | <a href="#">Sharma (2010) J Biosci 35, 187</a>                                                                                                                                 |
| c.1305T>G                        | p.(Asn435Lys) | <a href="#">Sharma (2010) J Biosci 35, 187</a>                                                                                                                                 |
| c.1318C>T                        | p.(Arg440*)   | <a href="#">Pérez-Grijalba (2019) Mol Genet Genomic Med 7,</a>                                                                                                                 |
| c.1447C>T                        | p.(Arg483*)   | <a href="#">Pérez-Grijalba (2019) Mol Genet Genomic Med 7,</a>                                                                                                                 |
| c.1483C>T                        | p.(Gln495*)   | <a href="#">Spena (2015) Clin Genet 88, 431</a><br><a href="#">Cross (2020) Am J Med Genet A 182: 2508</a>                                                                     |
| c.1549C>T                        | p.(Gln517*)   | <a href="#">Cross (2020) Am J Med Genet A 182, 2508</a>                                                                                                                        |
| c.1646C>G                        | p.(Ser549*)   | <a href="#">Cross (2020) Am J Med Genet A 182, 2508</a>                                                                                                                        |
| c.1652T>C                        | p.(Leu551Pro) | <a href="#">Schorry (2008) Am J Med Genet A 146A,2512</a>                                                                                                                      |
| c.1775G>A                        | p.(Trp592*)   | <a href="#">Hu (2018) Genet Med 20, 1045</a>                                                                                                                                   |
| c.1801C>T                        | p.(Arg601Trp) | <a href="#">Cross (2020) Am J Med Genet A 182, 2508</a>                                                                                                                        |
| c.1811T>C                        | p.(Leu604Pro) | <a href="#">Suzuki (2013) Clin Genet 83, 291</a>                                                                                                                               |
| c.1828C>T                        | p.(Gln610*)   | <a href="#">Schorry (2008) Am J Med Genet A 146A,2512</a><br><a href="#">Xiong (2015) Science 347: 1254806</a>                                                                 |
| c.1949A>T                        | p.(Tyr650Phe) | <a href="#">Spena (2015) Clin Genet 88, 431</a>                                                                                                                                |
| c.1984C>T                        | p.(Gln662*)   | <a href="#">Bentivegna (2006) BMC Med Genet 7, 77</a><br><a href="#">Xiong (2015) Science 347: 1254806</a>                                                                     |
| c.2026C>T                        | p.(Gln676*)   | <a href="#">Schorry (2008) Am J Med Genet A 146A,2512</a><br><a href="#">Xiong (2015) Science 347: 1254806</a>                                                                 |
| c.2254C>T                        | p.(Gln752*)   | <a href="#">Saettini (2020) J Clin Immunol 40, 851</a>                                                                                                                         |
| c.2302C>T                        | p.(Arg768*)   | <a href="#">Schorry (2008) Am J Med Genet A 146A,2512</a><br><a href="#">Xiong (2015) Science 347: 1254806</a>                                                                 |
| c.2461C>T                        | p.(Gln821*)   | <a href="#">Spena (2015) Clin Genet 88, 431</a>                                                                                                                                |
| c.2641C>T                        | p.(Gln881*)   | <a href="#">Pérez-Grijalba (2019) Mol Genet Genomic Med 7,</a>                                                                                                                 |
| c.2678C>T                        | p.(Ser893Leu) | <a href="#">Schorry (2008) Am J Med Genet A 146A,2512</a><br><a href="#">Bodian (2014) PLoS One 9: e94554</a><br><a href="#">Rego (2018) Cold Spring Harb Mol Case Stud 4:</a> |
| c.2773C>T                        | p.(Gln925*)   | <a href="#">Cross (2020) Am J Med Genet A 182, 2508</a>                                                                                                                        |

|           |                |                                                                                                                                                                                                |
|-----------|----------------|------------------------------------------------------------------------------------------------------------------------------------------------------------------------------------------------|
| c.2842C>T | p.(Gln948*)    | <a href="#">Wieczorek (2009) Am J Med Genet A <b>149A</b>,2849</a><br><a href="#">Xiong (2015) Science <b>347</b>: 1254806</a>                                                                 |
| c.2911A>T | p.(Arg971*)    | <a href="#">Cross (2020) Am J Med Genet A <b>182</b>, 2508</a>                                                                                                                                 |
| c.2941G>A | p.(Ala981Thr)  | <a href="#">Coupry (2002) J Med Genet <b>39</b>, 415</a><br><a href="#">Bodian (2014) PLoS One <b>9</b>: e94554</a>                                                                            |
| c.2959C>T | p.(Gln987*)    | <a href="#">Van-Gils (2019) Clin Genet <b>95</b>, 420</a>                                                                                                                                      |
| c.2986G>T | p.(Glu996*)    | <a href="#">Bartsch (2005) Hum Genet <b>117</b>, 485</a><br><a href="#">Xiong (2015) Science <b>347</b>: 1254806</a>                                                                           |
| c.3058G>T | p.(Glu1020*)   | <a href="#">Cross (2020) Am J Med Genet A <b>182</b>, 2508</a>                                                                                                                                 |
| c.3097A>T | p.(Lys1033*)   | <a href="#">Cross (2020) Am J Med Genet A <b>182</b>, 2508</a>                                                                                                                                 |
| c.3121C>T | p.(Gln1041*)   | <a href="#">Lee (2015) Brain Dev <b>37</b>, 402</a>                                                                                                                                            |
| c.3306T>A | p.(Tyr1102*)   | <a href="#">Hu (2020) Front Genet <b>11</b>, 00473</a>                                                                                                                                         |
| c.3307C>T | p.(Arg1103*)   | <a href="#">Lee (2015) Brain Dev <b>37</b>, 402</a>                                                                                                                                            |
| c.3452G>A | p.(Trp1151*)   | <a href="#">Wincent (2016) Mol Genet Genomic Med <b>4</b>,39</a>                                                                                                                               |
| c.3459C>G | p.(Tyr1153*)   | <a href="#">Yu (2019) Mol Genet Genomic Med <b>7</b>,</a>                                                                                                                                      |
| c.3474G>A | p.(Trp1158*)   | <a href="#">Bedeschi (2014) Am J Med Genet A <b>164</b>,2663</a>                                                                                                                               |
| c.3485A>G | p.(Asn1162Ser) | <a href="#">Schorry (2008) Am J Med Genet A <b>146A</b>,2512</a>                                                                                                                               |
| c.3494G>A | p.(Trp1165*)   | <a href="#">Spena (2015) Clin Genet <b>88</b>, 431</a>                                                                                                                                         |
| c.3503A>G | p.(Asn1168Ser) | <a href="#">Wang (2019) Clin Exp Dermatol <b>44</b>, e205</a>                                                                                                                                  |
| c.3514T>C | p.(Ser1172Pro) | <a href="#">Saettini (2020) J Clin Immunol <b>40</b>, 851</a>                                                                                                                                  |
| c.3517C>T | p.(Arg1173*)   | <a href="#">Bentivegna (2006) BMC Med Genet <b>7</b>, 77</a><br><a href="#">Xiong (2015) Science <b>347</b>: 1254806</a>                                                                       |
| c.3524A>G | p.(Tyr1175Cys) | <a href="#">Bartsch (2002) J Med Genet <b>39</b>, 496</a><br><a href="#">Cross (2020) Am J Med Genet A <b>182</b>: 2508</a>                                                                    |
| c.3535A>G | p.(Ser1179Gly) | <a href="#">Zhang (2014) Zhonghua Er Ke Za Zhi <b>52</b>,673</a><br><a href="#">Cross (2020) Am J Med Genet A <b>182</b>: 2508</a>                                                             |
| c.3625C>T | p.(Gln1209*)   | <a href="#">Cross (2020) Am J Med Genet A <b>182</b>, 2508</a>                                                                                                                                 |
| c.3639C>A | p.(Cys1213*)   | <a href="#">Bartsch (2005) Hum Genet <b>117</b>, 485</a>                                                                                                                                       |
| c.3649C>T | p.(Gln1217*)   | <a href="#">Saettini (2020) J Clin Immunol <b>40</b>, 851</a><br><a href="#">Wei (2021) Arch Dis Child <b>106</b>: 38</a>                                                                      |
| c.3690T>G | p.(Tyr1230*)   | <a href="#">Cross (2020) Am J Med Genet A <b>182</b>, 2508</a>                                                                                                                                 |
| c.3719G>A | p.(Cys1240Tyr) | <a href="#">Cross (2020) Am J Med Genet A <b>182</b>, 2508</a>                                                                                                                                 |
| c.3805A>T | p.(Lys1269*)   | <a href="#">Coupry (2002) J Med Genet <b>39</b>, 415</a><br><a href="#">Xiong (2015) Science <b>347</b>: 1254806</a>                                                                           |
| c.3833A>C | p.(Glu1278Ala) | <a href="#">Spena (2015) Clin Genet <b>88</b>, 431</a>                                                                                                                                         |
| c.3833A>G | p.(Glu1278Gly) | <a href="#">Udaka (2005) Congenit Anom (Kyoto) <b>45</b>,125</a>                                                                                                                               |
| c.3832G>A | p.(Glu1278Lys) | <a href="#">Kalkhoven (2003) Hum Mol Genet <b>12</b>, 441</a><br><a href="#">Cross (2020) Am J Med Genet A <b>182</b>: 2508</a>                                                                |
| c.3872A>G | p.(His1291Arg) | <a href="#">Suzuki (2013) Clin Genet <b>83</b>, 291</a>                                                                                                                                        |
| c.4001T>C | p.(Leu1334Pro) | <a href="#">Schorry (2008) Am J Med Genet A <b>146A</b>,2512</a>                                                                                                                               |
| c.4003G>C | p.(Gly1335Arg) | <a href="#">Li (2010) Am J Med Genet A <b>152A</b>, 2939</a>                                                                                                                                   |
| c.4014G>C | p.(Leu1338Phe) | <a href="#">Lopez-Atalaya (2012) J Med Genet <b>49</b>, 66</a>                                                                                                                                 |
| c.4021C>T | p.(Arg1341*)   | <a href="#">Suzuki (2013) Clin Genet <b>83</b>, 291</a>                                                                                                                                        |
| c.4040G>C | p.(Arg1347Pro) | <a href="#">Cross (2020) Am J Med Genet A <b>182</b>, 2508</a>                                                                                                                                 |
| c.4078C>T | p.(Arg1360*)   | <a href="#">Chiang (2009) Am J Med Genet A <b>149A</b>,1463</a><br><a href="#">Xiong (2015) Science <b>347</b>: 1254806</a><br><a href="#">Cross (2020) Am J Med Genet A <b>182</b>: 2508</a>  |
| c.4112T>A | p.(Val1371Asp) | <a href="#">Yu (2019) Mol Genet Genomic Med <b>7</b>,</a>                                                                                                                                      |
| c.4118C>A | p.(Pro1373His) | <a href="#">Yu (2019) Mol Genet Genomic Med <b>7</b>,</a>                                                                                                                                      |
| c.4133G>C | p.(Arg1378Pro) | <a href="#">Murata (2001) Hum Mol Genet <b>10</b>, 1071</a><br><a href="#">Xiong (2015) Science <b>347</b>: 1254806</a>                                                                        |
| c.4145C>T | p.(Ser1382Phe) | <a href="#">Cross (2020) Am J Med Genet A <b>182</b>, 2508</a>                                                                                                                                 |
| c.4151A>G | p.(Glu1384Gly) | <a href="#">Sharma (2010) J Biosci <b>35</b>, 187</a>                                                                                                                                          |
| c.4175G>T | p.(Arg1392Leu) | <a href="#">Cross (2020) Am J Med Genet A <b>182</b>, 2508</a>                                                                                                                                 |
| c.4174C>T | p.(Arg1392*)   | <a href="#">Schorry (2008) Am J Med Genet A <b>146A</b>,2512</a><br><a href="#">Xiong (2015) Science <b>347</b>: 1254806</a><br><a href="#">Cross (2020) Am J Med Genet A <b>182</b>: 2508</a> |
| c.4216G>T | p.(Asp1406Tyr) | <a href="#">Spena (2015) Clin Genet <b>88</b>, 431</a>                                                                                                                                         |
| c.4224C>A | p.(Cys1408*)   | <a href="#">Schorry (2008) Am J Med Genet A <b>146A</b>,2512</a><br><a href="#">Xiong (2015) Science <b>347</b>: 1254806</a>                                                                   |
| c.4238A>C | p.(His1413Pro) | <a href="#">Udaka (2005) Congenit Anom (Kyoto) <b>45</b>,125</a>                                                                                                                               |
| c.4244A>G | p.(Gln1415Arg) | <a href="#">Pérez-Grijalba (2019) Mol Genet Genomic Med <b>7</b>,</a>                                                                                                                          |

|           |                |                                                                                                                                                                                 |
|-----------|----------------|---------------------------------------------------------------------------------------------------------------------------------------------------------------------------------|
| c.4244A>C | p.(Gln1415Pro) | <a href="#">Spena (2015) Clin Genet <b>88</b>, 431</a>                                                                                                                          |
| c.4243C>T | p.(Gln1415*)   | <a href="#">Cross (2020) Am J Med Genet A <b>182</b>, 2508</a>                                                                                                                  |
| c.4262G>T | p.(Cys1421Phe) | <a href="#">Miller (2020) Cold Spring Harb Mol Case Stud <b>6</b>,</a>                                                                                                          |
| c.4277C>G | p.(Thr1426Arg) | <a href="#">Cross (2020) Am J Med Genet A <b>182</b>, 2508</a>                                                                                                                  |
| c.4280G>C | p.(Arg1427Thr) | <a href="#">Schorry (2008) Am J Med Genet A <b>146A</b>,2512</a>                                                                                                                |
| c.4283G>C | p.(Arg1428Pro) | <a href="#">Cross (2020) Am J Med Genet A <b>182</b>, 2508</a>                                                                                                                  |
| c.4290C>A | p.(Tyr1430*)   | <a href="#">Cross (2020) Am J Med Genet A <b>182</b>, 2508</a>                                                                                                                  |
| c.4297T>C | p.(Tyr1433His) | <a href="#">Cross (2020) Am J Med Genet A <b>182</b>, 2508</a>                                                                                                                  |
| c.4303G>T | p.(Asp1435Tyr) | <a href="#">Cross (2020) Am J Med Genet A <b>182</b>, 2508</a>                                                                                                                  |
| c.4304A>T | p.(Asp1435Val) | <a href="#">Bartsch (2005) Hum Genet <b>117</b>, 485</a>                                                                                                                        |
| c.4340C>T | p.(Thr1447Ile) | <a href="#">Roelfsema (2005) Am J Hum Genet <b>76</b>, 572</a>                                                                                                                  |
| c.4348T>C | p.(Tyr1450His) | <a href="#">Roelfsema (2005) Am J Hum Genet <b>76</b>, 572</a>                                                                                                                  |
| c.4361T>A | p.(Leu1454His) | <a href="#">Tajir (2013) Gene <b>518</b>, 476</a>                                                                                                                               |
| c.4377G>C | p.(Glu1459Asp) | <a href="#">Sharma (2010) J Biosci <b>35</b>, 187</a>                                                                                                                           |
| c.4394G>A | p.(Gly1465Glu) | <a href="#">Pérez-Grijalba (2019) Mol Genet Genomic Med <b>7</b>,</a>                                                                                                           |
| c.4398T>A | p.(Tyr1466*)   | <a href="#">Couprie (2002) J Med Genet <b>39</b>, 415</a><br><a href="#">Xiong (2015) Science <b>347</b>: 1254806</a>                                                           |
| c.4409A>G | p.(His1470Arg) | <a href="#">Roelfsema (2005) Am J Hum Genet <b>76</b>, 572</a>                                                                                                                  |
| c.4417G>A | p.(Ala1473Thr) | <a href="#">Cross (2020) Am J Med Genet A <b>182</b>, 2508</a>                                                                                                                  |
| c.4423C>A | p.(Pro1475Thr) | <a href="#">Spena (2015) Clin Genet <b>88</b>, 431</a>                                                                                                                          |
| c.4435G>T | p.(Gly1479*)   | <a href="#">Bentivegna (2006) BMC Med Genet <b>7</b>, 77</a><br><a href="#">Xiong (2015) Science <b>347</b>: 1254806</a>                                                        |
| c.4439A>G | p.(Asp1480Gly) | <a href="#">Liu (2019) N Engl J Med <b>380</b>, 2478</a><br><a href="#">Cross (2020) Am J Med Genet A <b>182</b>: 2508</a>                                                      |
| c.4444T>G | p.(Tyr1482Asp) | <a href="#">Lopez-Atalaya (2012) J Med Genet <b>49</b>, 66</a>                                                                                                                  |
| c.4445A>G | p.(Tyr1482Cys) | <a href="#">Bentivegna (2006) BMC Med Genet <b>7</b>, 77</a>                                                                                                                    |
| c.4460A>G | p.(His1487Arg) | <a href="#">Cross (2020) Am J Med Genet A <b>182</b>, 2508</a>                                                                                                                  |
| c.4459C>T | p.(His1487Tyr) | <a href="#">Cross (2020) Am J Med Genet A <b>182</b>, 2508</a>                                                                                                                  |
| c.4492C>T | p.(Arg1498*)   | <a href="#">Couprie (2002) J Med Genet <b>39</b>, 415</a><br><a href="#">Xiong (2015) Science <b>347</b>: 1254806</a><br><a href="#">Anazi (2018) Hum Genet <b>137</b>: 105</a> |
| c.4499A>C | p.(Gln1500Pro) | <a href="#">Schorry (2008) Am J Med Genet A <b>146A</b>,2512</a>                                                                                                                |
| c.4508A>G | p.(Tyr1503Cys) | <a href="#">Schorry (2008) Am J Med Genet A <b>146A</b>,2512</a>                                                                                                                |
| c.4507T>C | p.(Tyr1503His) | <a href="#">Huang (2018) Cell Physiol Biochem <b>49</b>, 295</a>                                                                                                                |
| c.4508A>T | p.(Tyr1503Phe) | <a href="#">Spena (2015) Clin Genet <b>88</b>, 431</a>                                                                                                                          |
| c.4520T>C | p.(Leu1507Pro) | <a href="#">Spena (2015) Clin Genet <b>88</b>, 431</a>                                                                                                                          |
| c.4557C>A | p.(Tyr1519*)   | <a href="#">Schorry (2008) Am J Med Genet A <b>146A</b>,2512</a><br><a href="#">Xiong (2015) Science <b>347</b>: 1254806</a>                                                    |
| c.4557C>G | p.(Tyr1519*)   | <a href="#">Pérez-Grijalba (2019) Mol Genet Genomic Med <b>7</b>,</a>                                                                                                           |
| c.4597A>T | p.(Ser1533Cys) | <a href="#">Sharma (2010) J Biosci <b>35</b>, 187</a>                                                                                                                           |
| c.4613C>G | p.(Pro1538Arg) | <a href="#">Wincent (2016) Mol Genet Genomic Med <b>4</b>,39</a>                                                                                                                |
| c.4613C>T | p.(Pro1538Leu) | <a href="#">Cross (2020) Am J Med Genet A <b>182</b>, 2508</a>                                                                                                                  |
| c.4627G>A | p.(Asp1543Asn) | <a href="#">Spena (2015) Clin Genet <b>88</b>, 431</a>                                                                                                                          |
| c.4627G>T | p.(Asp1543Tyr) | <a href="#">Bentivegna (2006) BMC Med Genet <b>7</b>, 77</a>                                                                                                                    |
| c.4660A>T | p.(Lys1554*)   | <a href="#">Yu (2019) Mol Genet Genomic Med <b>7</b>,</a>                                                                                                                       |
| c.4665A>C | p.(Glu1555Asp) | <a href="#">Fokstuen (2016) Hum Genomics <b>10</b>, 24</a>                                                                                                                      |
| c.4672C>T | p.(Gln1558*)   | <a href="#">Kalkhoven (2003) Hum Mol Genet <b>12</b>, 441</a><br><a href="#">Xiong (2015) Science <b>347</b>: 1254806</a>                                                       |
| c.4762A>T | p.(Lys1588*)   | <a href="#">Spena (2015) Clin Genet <b>88</b>, 431</a>                                                                                                                          |
| c.4804C>T | p.(Arg1602Cys) | <a href="#">Carli (2013) Birth Defects Res A Clin Mol Teratol <b>97</b>, 798</a>                                                                                                |
| c.4813A>T | p.(Lys1605*)   | <a href="#">Waldmüller (2015) Mol Cell Probes <b>29</b>, 308</a>                                                                                                                |
| c.4837G>A | p.(Val1613Met) | <a href="#">Sharma (2010) J Biosci <b>35</b>, 187</a>                                                                                                                           |
| c.4874T>C | p.(Met1625Thr) | <a href="#">Schorry (2008) Am J Med Genet A <b>146A</b>,2512</a>                                                                                                                |
| c.4879A>T | p.(Lys1627*)   | <a href="#">Roelfsema (2005) Am J Hum Genet <b>76</b>, 572</a><br><a href="#">Xiong (2015) Science <b>347</b>: 1254806</a>                                                      |
| c.4990C>T | p.(Arg1664Cys) | <a href="#">Zhu (2020) Front Genet <b>11</b>, 565078</a>                                                                                                                        |
| c.4991G>A | p.(Arg1664His) | <a href="#">Kalkhoven (2003) Hum Mol Genet <b>12</b>, 441</a><br><a href="#">Cross (2020) Am J Med Genet A <b>182</b>: 2508</a>                                                 |
| c.5003T>A | p.(Leu1668His) | <a href="#">Sharma (2010) J Biosci <b>35</b>, 187</a>                                                                                                                           |
| c.5058G>A | p.(Trp1686*)   | <a href="#">Pérez-Grijalba (2019) Mol Genet Genomic Med <b>7</b>,</a>                                                                                                           |
| c.5060C>T | p.(Ser1687Phe) | <a href="#">Lopez-Atalaya (2012) J Med Genet <b>49</b>, 66</a>                                                                                                                  |

|           |                |                                                                                                                             |
|-----------|----------------|-----------------------------------------------------------------------------------------------------------------------------|
| c.5170G>A | p.(Glu1724Lys) | <a href="#">Sharma (2010) J Biosci <b>35</b>, 187</a><br><a href="#">Angius (2019) Am J Med Genet A <b>179</b>: 634</a>     |
| c.5204C>G | p.(Thr1735Arg) | <a href="#">Sharma (2010) J Biosci <b>35</b>, 187</a>                                                                       |
| c.5635C>T | p.(Gln1879*)   | <a href="#">Bartsch (2005) Hum Genet <b>117</b>, 485</a>                                                                    |
| c.5638C>T | p.(Gln1880*)   | <a href="#">Monies (2017) Hum Genet <b>136</b>, 921</a><br><a href="#">Yu (2019) Mol Genet Genomic Med <b>7</b>: e1009</a>  |
| c.5905C>T | p.(Gln1969*)   | <a href="#">Yu (2019) Mol Genet Genomic Med <b>7</b>,</a><br><a href="#">Cross (2020) Am J Med Genet A <b>182</b>: 2508</a> |
| c.5933A>G | p.(Asn1978Ser) | <a href="#">Couprie (2002) J Med Genet <b>39</b>, 415</a><br><a href="#">Bodian (2014) PLoS One <b>9</b>: e94554</a>        |
| c.6010C>T | p.(Arg2004*)   | <a href="#">Roelfsema (2005) Am J Hum Genet <b>76</b>, 572</a>                                                              |
| c.6019C>T | p.(Gln2007*)   | <a href="#">Bartsch (2005) Hum Genet <b>117</b>, 485</a>                                                                    |
| c.6127C>T | p.(Gln2043*)   | <a href="#">Couprie (2002) J Med Genet <b>39</b>, 415</a>                                                                   |
| c.6133C>T | p.(Gln2045*)   | <a href="#">Roelfsema (2005) Am J Hum Genet <b>76</b>, 572</a>                                                              |
| c.6283C>T | p.(Gln2095*)   | <a href="#">Roelfsema (2005) Am J Hum Genet <b>76</b>, 572</a>                                                              |
| c.6661A>C | p.(Met2221Leu) | <a href="#">Couprie (2002) J Med Genet <b>39</b>, 415</a>                                                                   |
| c.6728C>T | p.(Ala2243Val) | <a href="#">Couprie (2002) J Med Genet <b>39</b>, 415</a>                                                                   |

### Small deletions: 96 mutations

| Nucleotide              | Protein              | Reference                                                                                                          |
|-------------------------|----------------------|--------------------------------------------------------------------------------------------------------------------|
| c.173_185del13          | p.(Asn58Metfs*25)    | <a href="#">Cross (2020) Am J Med Genet A <b>182</b>, 2508</a>                                                     |
| c.201_202delTA          | p.(His67Glnfs*14)    | <a href="#">Qaksen (2009) Genet Couns <b>20</b>,255</a>                                                            |
| c.236delG               | p.(Gly79Alafs*8)     | <a href="#">Roelfsema (2005) Am J Hum Genet <b>76</b>, 572</a>                                                     |
| c.474_493del20          | p.(Val159Profs*15)   | <a href="#">Bartsch (2005) Hum Genet <b>117</b>,485</a>                                                            |
| c.494_507del14          | p.(Ser165Thrfs*11)   | <a href="#">Cross (2020) Am J Med Genet A <b>182</b>, 2508</a>                                                     |
| c.537delT               | p.(Asn180Thrfs*18)   | <a href="#">Schorry (2008) Am J Med Genet A <b>146A</b>, 2512</a>                                                  |
| c.547delC               | p.(Gln183Argfs*15)   | <a href="#">Schorry (2008) Am J Med Genet A <b>146A</b>, 2512</a>                                                  |
| c.662_698del            | p.(Gly221Alafs*11)   | <a href="#">Cross (2020) Am J Med Genet A <b>182</b>, 2508</a>                                                     |
| c.806_807delTA          | p.(Ile269Asnfs*12)   | <a href="#">Schorry (2008) Am J Med Genet A <b>146A</b>, 2512</a>                                                  |
| c.810_811delTG          | p.(Gly271Glufs*10)   | <a href="#">Spena (2015) Clin Genet <b>88</b>,431</a>                                                              |
| c.885_886delCC          | p.(Gln296Valfs*53)   | <a href="#">Spena (2015) Clin Genet <b>88</b>,431</a>                                                              |
| c.904_905delAG          | p.(Ser302Hisfs*47)   | <a href="#">Roelfsema (2005) Am J Hum Genet <b>76</b>, 572</a>                                                     |
| c.1044delT              | p.(Glu349Lysfs*5)    | <a href="#">Welters (2019) Eur J Endocrinol ,</a><br><a href="#">Cross (2020) Am J Med Genet A<b>182</b>: 2508</a> |
| c.1113delG              | p.(Glu371Aspfs*18)   | <a href="#">Gao (2018) Zhonghua Yi Xue Za Zhi <b>98</b>, 3426</a>                                                  |
| c.1124delG              | p.(Gly375Glufs*14)   | <a href="#">Cross (2020) Am J Med Genet A <b>182</b>, 2508</a>                                                     |
| c.1225_1231delITGTGCAT  | p.(Cys409Leufs*23)   | <a href="#">Cross (2020) Am J Med Genet A <b>182</b>, 2508</a>                                                     |
| c.1238delG              | p.(Arg413Hisfs*21)   | <a href="#">Schorry (2008) Am J Med Genet A <b>146A</b>, 2512</a>                                                  |
| c.1251_1252delITC       | p.(His418Leufs*8)    | <a href="#">Van-Gils (2019) Clin Genet <b>95</b>,420</a>                                                           |
| c.1257delG              | p.(Trp419*)          | <a href="#">Spena (2015) Clin Genet <b>88</b>,431</a>                                                              |
| c.1280_1281delGT        | p.(Cys427Serfs*11)   | <a href="#">Yu (2019) Mol Genet Genomic Med <b>7</b>,</a>                                                          |
| c.1382_1389delGCACAGGG  | p.(Gly461Alafs*9)    | <a href="#">Roelfsema (2005) Am J Hum Genet <b>76</b>, 572</a>                                                     |
| c.1425delC              | p.(Ile476*)          | <a href="#">Schorry (2008) Am J Med Genet A <b>146A</b>, 2512</a>                                                  |
| c.1515_1521delTGGCCAG   | p.(Gly506Asnfs*11)   | <a href="#">Spena (2015) Clin Genet <b>88</b>,431</a>                                                              |
| c.1715delG              | p.(Gly572Glufs*17)   | <a href="#">Tang (2019) Orphanet J Rare Dis <b>14</b>, 45</a>                                                      |
| c.1733delC              | p.(Pro578Glnfs*11)   | <a href="#">Udaka (2005) Congenit Anom (Kyoto) <b>45</b>, 125</a>                                                  |
| c.1891_1895delGCCTA     | p.(Ala631Cysfs*2)    | <a href="#">Bartsch (2005) Hum Genet <b>117</b>,485</a>                                                            |
| c.1907_1912delTGGAAG    | p.(Val636_Glu637del) | <a href="#">Cross (2020) Am J Med Genet A <b>182</b>, 2508</a>                                                     |
| c.1941+1_1941+5delGTAGG | Not yet available    | <a href="#">Pérez-Grijalba (2019) Mol Genet Genomic Med <b>7</b>,</a>                                              |
| c.2064_2077del14        | p.(Gly689Cysfs*32)   | <a href="#">Huh (2015) Ann Clin Lab Sci <b>45</b>, 458</a>                                                         |
| c.2199delG              | p.(Gln733Hisfs*15)   | <a href="#">Yoo (2015) Int J Mol Sci <b>16</b>,5697</a>                                                            |
| c.2204delC              | p.(Pro735Hisfs*13)   | <a href="#">Maddirevula (2018) Genet Med <b>20</b>, 12</a>                                                         |
| c.2239_2246delATGAACCA  | p.(Met747Leufs*82)   | <a href="#">Suzuki (2013) Clin Genet <b>83</b>,291</a>                                                             |
| c.2330delG              | p.(Gly777Valfs*7)    | <a href="#">Cross (2020) Am J Med Genet A <b>182</b>, 2508</a>                                                     |
| c.2356delC              | p.(Gln786Argfs*21)   | <a href="#">Lopez-Atalaya (2012) J Med Genet <b>49</b>, 66</a>                                                     |
| c.2459delC              | p.(Ser820Tyrfs*29)   | <a href="#">Yu (2019) Mol Genet Genomic Med <b>7</b>,</a>                                                          |
| c.2479delG              | p.(Ala827Leufs*22)   | <a href="#">Schorry (2008) Am J Med Genet A <b>146A</b>, 2512</a>                                                  |
| c.2527delC              | p.(Leu843Tyrfs*6)    | <a href="#">Schorry (2008) Am J Med Genet A <b>146A</b>, 2512</a>                                                  |
| c.2621delC              | p.(Pro874Hisfs*4)    | <a href="#">Pérez-Grijalba (2019) Mol Genet Genomic Med <b>7</b>,</a>                                              |
| c.2715_2716delAG        | p.(Val906Alafs*63)   | <a href="#">Spena (2015) Clin Genet <b>88</b>,431</a>                                                              |
| c.2713_2719delTCAGTGC   | p.(Ser905Profs*20)   | <a href="#">Cross (2020) Am J Med Genet A <b>182</b>, 2508</a>                                                     |
| c.2747delC              | p.(Pro916Leufs*11)   | <a href="#">Schorry (2008) Am J Med Genet A <b>146A</b>, 2512</a>                                                  |



|                         |                     |                                                                                                                                                                             |
|-------------------------|---------------------|-----------------------------------------------------------------------------------------------------------------------------------------------------------------------------|
| c.2825delC              | p.(Pro942Leufs*56)  | <a href="#">Van-Gils (2019) Clin Genet 95,420</a>                                                                                                                           |
| c.2827delC              | p.(Gln943Serfs*55)  | <a href="#">Coupry (2002) J Med Genet 39,415</a>                                                                                                                            |
| c.3032delG              | p.(Gly1011Valfs*11) | <a href="#">Suzuki (2013) Clin Genet 83,291</a>                                                                                                                             |
| c.3260delC              | p.(Pro1087Glnfs*12) | <a href="#">Schorry (2008) Am J Med Genet A 146A, 2512</a>                                                                                                                  |
| c.3292delC              | p.(Leu1098*)        | <a href="#">Cross (2020) Am J Med Genet A 182, 2508</a>                                                                                                                     |
| c.3330_3334delTTTCC     | p.(Phe1111Alafs*15) | <a href="#">Cross (2020) Am J Med Genet A 182, 2508</a>                                                                                                                     |
| c.3396_3400delCATGG     | p.(Met1133Profs*34) | <a href="#">Roelfsema (2005) Am J Hum Genet 76, 572</a>                                                                                                                     |
| c.3432_3433delAG        | p.(Gly1145Alafs*23) | <a href="#">Roelfsema (2005) Am J Hum Genet 76, 572</a><br><a href="#">Cross (2020) Am J Med Genet A 182: 2508</a>                                                          |
| c.3501_3502delTA        | p.(Tyr1167*)        | <a href="#">Murata (2001) Hum Mol Genet 10, 1071</a>                                                                                                                        |
| c.3608_3609+5delAGGTACA | Not yet available   | <a href="#">Spena (2015) Clin Genet 88,431</a>                                                                                                                              |
| c.3609+2_3609+5delTACA  | Not yet available   | <a href="#">Pérez-Grijalba (2019) Mol Genet Genomic Med 7,</a>                                                                                                              |
| c.3661_3665delATTCC     | p.(Ile1221Serfs*11) | <a href="#">Cross (2020) Am J Med Genet A 182, 2508</a>                                                                                                                     |
| c.3715_3716delAA        | p.(Lys1239Valfs*14) | <a href="#">Bentivegna (2006) BMC Med Genet 7, 77</a>                                                                                                                       |
| c.3751delC              | p.(Leu1251Trpfs*25) | <a href="#">Spena (2015) Clin Genet 88,431</a>                                                                                                                              |
| c.3767_3769delCAC       | p.(Ser1256*)        | <a href="#">Bartsch (2005) Hum Genet 117,485</a>                                                                                                                            |
| c.3832delG              | p.(Glu1278Asnfs*35) | <a href="#">Cross (2020) Am J Med Genet A 182, 2508</a>                                                                                                                     |
| c.3858_3859delTG        | p.(Cys1286Trpfs*13) | <a href="#">Spena (2015) Clin Genet 88,431</a>                                                                                                                              |
| c.4080_4090del11        | p.(Val1361Leufs*23) | <a href="#">Petrij (2000) J Med Genet 37,168</a>                                                                                                                            |
| c.4129_4133+9del14      | Not yet available   | <a href="#">Kosaki (2020) Am J Med Genet A 182, 1601</a>                                                                                                                    |
| c.4169delC              | p.(Pro1390Hisfs*69) | <a href="#">Schorry (2008) Am J Med Genet A 146A, 2512</a>                                                                                                                  |
| c.4189_4192delTTTG      | p.(Phe1397Leufs*61) | <a href="#">Lee (2015) Brain Dev 37, 402</a>                                                                                                                                |
| c.4256_4257delCT        | p.(Ser1419*)        | <a href="#">Kalkhoven (2003) Hum Mol Genet 12, 441</a>                                                                                                                      |
| c.4274delA              | p.(Asn1425Thrfs*34) | <a href="#">Van-Gils (2019) Clin Genet 95,420</a>                                                                                                                           |
| c.4399delG              | p.(Val1467*)        | <a href="#">Roelfsema (2005) Am J Hum Genet 76, 572</a>                                                                                                                     |
| c.4400delT              | p.(Val1467Glyfs*83) | <a href="#">Spena (2015) Clin Genet 88,431</a>                                                                                                                              |
| c.4400_4401delTG        | p.(Val1467Aspfs*11) | <a href="#">Lee (2015) Brain Dev 37, 402</a>                                                                                                                                |
| c.4404_4405delAG        | p.(Gly1469Alafs*9)  | <a href="#">Murata (2001) Hum Mol Genet 10, 1071</a>                                                                                                                        |
| c.4425_4426delTC        | p.(Pro1476Lysfs*2)  | <a href="#">Schorry (2008) Am J Med Genet A 146A, 2512</a>                                                                                                                  |
| c.4444delT              | p.(Tyr1482Thrfs*68) | <a href="#">Schorry (2008) Am J Med Genet A 146A, 2512</a>                                                                                                                  |
| c.4611delG              | p.(Tyr1539Ilefs*11) | <a href="#">Udaka (2005) Congenit Anom (Kyoto) 45, 125</a>                                                                                                                  |
| c.4644_4645delGT        | p.(Leu1549Argfs*5)  | <a href="#">Cross (2020) Am J Med Genet A 182, 2508</a>                                                                                                                     |
| c.4650_4654delAGAGA     | p.(Glu1551Hisfs*2)  | <a href="#">Spena (2015) Clin Genet 88,431</a><br><a href="#">Milani (2016) Pediatr Blood Cancer 63: 572</a>                                                                |
| c.4728+2delT            | Not yet available   | <a href="#">Cross (2020) Am J Med Genet A 182, 2508</a>                                                                                                                     |
| c.4837delG              | p.(Val1613Cysfs*22) | <a href="#">Kalkhoven (2003) Hum Mol Genet 12, 441</a>                                                                                                                      |
| c.4897_4899delTTC       | p.(Phe1633del)      | <a href="#">Wang (2020) J Mol Neurosci epub, epub</a>                                                                                                                       |
| c.4945delA              | p.(Ile1649Serfs*95) | <a href="#">Coupry (2002) J Med Genet 39,415</a>                                                                                                                            |
| c.4963delC              | p.(Leu1655Cysfs*89) | <a href="#">Bentivegna (2006) BMC Med Genet 7, 77</a><br><a href="#">Al-Qattan (2019) BMC Med Genet 20: 12</a>                                                              |
| c.4995_4999delCGCCT     | p.(Ala1666Profs*67) | <a href="#">Zhang (2014) Zhonghua Er Ke Za Zhi 52, 673</a>                                                                                                                  |
| c.5016delA              | p.(Asp1673Thrfs*71) | <a href="#">Schorry (2008) Am J Med Genet A 146A, 2512</a>                                                                                                                  |
| c.5039_5041delCCT       | p.(Ser1680del)      | <a href="#">Schorry (2008) Am J Med Genet A 146A, 2512</a><br><a href="#">de Vries (2016) Eur J Hum Genet 24: 1363</a><br><a href="#">Van-Gils (2019) Clin Genet 95:420</a> |
| c.5722delC              | p.(Gln1908Serfs*7)  | <a href="#">Cross (2020) Am J Med Genet A 182, 2508</a>                                                                                                                     |
| c.5790delC              | p.(Thr1931Profs*45) | <a href="#">Spena (2015) Clin Genet 88,431</a>                                                                                                                              |
| c.5837delC              | p.(Pro1946Hisfs*30) | <a href="#">Spena (2015) Clin Genet 88,431</a><br><a href="#">Yu (2019) Mol Genet Genomic Med 7: e1009</a>                                                                  |
| c.5877_5881delTCGGC     | p.(Arg1960Aspfs*4)  | <a href="#">Hu (2018) Genet Med 20, 1045</a>                                                                                                                                |
| c.5948delC              | p.(Pro1983Glnfs*16) | <a href="#">Lee (2015) Brain Dev 37, 402</a>                                                                                                                                |
| c.5986delG              | p.(Ala1996Profs*3)  | <a href="#">Cross (2020) Am J Med Genet A 182, 2508</a>                                                                                                                     |
| c.6043delA              | p.(Ser2015Alafs*25) | <a href="#">Bentivegna (2006) BMC Med Genet 7, 77</a>                                                                                                                       |
| c.6065_6071delAGCAGGC   | p.(Gln2022Argfs*16) | <a href="#">Bentivegna (2006) BMC Med Genet 7, 77</a>                                                                                                                       |
| c.6107_6116del10        | p.(Pro2036Argfs*36) | <a href="#">Pérez-Grijalba (2019) Mol Genet Genomic Med 7,</a>                                                                                                              |
| c.6113_6137del          | p.(Pro2038Argfs*29) | <a href="#">Cross (2020) Am J Med Genet A 182, 2508</a>                                                                                                                     |
| c.6122_6125delCCAT      | p.(Ser2041Cysfs*33) | <a href="#">Chiang (2009) Am J Med Genet A 149A, 1463</a>                                                                                                                   |
| c.6166delG              | p.(Val2056Cysfs*19) | <a href="#">Spena (2015) Clin Genet 88,431</a>                                                                                                                              |
| c.6192delC              | p.(Ser2065Alafs*10) | <a href="#">Spena (2015) Clin Genet 88,431</a>                                                                                                                              |
| c.6221_6230del10        | p.(Leu2074Profs*11) | <a href="#">Cross (2020) Am J Med Genet A 182, 2508</a>                                                                                                                     |
| c.6250delC              | p.(Gln2084Serfs*4)  | <a href="#">Spena (2015) Clin Genet 88,431</a>                                                                                                                              |

### Small insertions: 56 mutations

| Nucleotide                       | Protein              | Reference                                                                                                                                                          |
|----------------------------------|----------------------|--------------------------------------------------------------------------------------------------------------------------------------------------------------------|
| c.134_135insCA                   | p.(Pro46Asnfs*7)     | <a href="#">Schorry (2008) Am J Med Genet A 146A, 2512</a>                                                                                                         |
| c.243_244insTA                   | p.(Ile82*)           | <a href="#">Cross (2020) Am J Med Genet A 182, 2508</a>                                                                                                            |
| c.317dupA                        | p.(Pro107Alafs*5)    | <a href="#">Spena (2015) Clin Genet 88, 431</a>                                                                                                                    |
| c.605dupC                        | p.(Gln203Thrfs*39)   | <a href="#">de Kort (2014) Am J Med Genet A 164, 1332</a>                                                                                                          |
| c.840dupT                        | p.(Ser281*)          | <a href="#">Coupry (2002) J Med Genet 39, 415</a>                                                                                                                  |
| c.967_974dup                     | p.(Met325Ilefs*32)   | <a href="#">Cross (2020) Am J Med Genet A 182, 2508</a>                                                                                                            |
| c.1062dupA                       | p.(Gln355Thrfs*12)   | <a href="#">Yu (2019) Mol Genet Genomic Med 7,</a><br><a href="#">Wang (2020) Hum Genet 139: 473</a>                                                               |
| c.1481dupA                       | p.(Asn494Lysfs*34)   | <a href="#">Roelfsema (2005) Am J Hum Genet 76, 572</a>                                                                                                            |
| c.1570dupC                       | p.(Leu524Profs*4)    | <a href="#">Spena (2015) Clin Genet 88, 431</a>                                                                                                                    |
| c.1735dupA                       | p.(Thr579Asnfs*7)    | <a href="#">Roelfsema (2005) Am J Hum Genet 76, 572</a>                                                                                                            |
| c.1915_1916dupGA                 | p.(Asp639Glufs*17)   | <a href="#">Spena (2015) Clin Genet 88, 431</a>                                                                                                                    |
| c.2041_2042insC                  | p.(Asn681Thrfs*45)   | <a href="#">Pérez-Grijalba (2019) Mol Genet Genomic Med 7,</a>                                                                                                     |
| c.2045dupA                       | p.(Pro683Alafs*43)   | <a href="#">Coupry (2002) J Med Genet 39, 415</a>                                                                                                                  |
| c.2057dupC                       | p.(Ala687Serfs*39)   | <a href="#">Eser (2017) Turk J Pediatr 59, 601</a>                                                                                                                 |
| c.2178dupC                       | p.(Met727Hisfs*105)  | <a href="#">Schorry (2008) Am J Med Genet A 146A, 2512</a>                                                                                                         |
| c.2190dupG                       | p.(Asn731Glufs*101)  | <a href="#">Pérez-Grijalba (2019) Mol Genet Genomic Med 7,</a>                                                                                                     |
| c.2616dup                        | p.(Thr873Aspfs* 97)  | <a href="#">Sequeo (2020) J Med Genet 57, 760</a>                                                                                                                  |
| c.2308_2315dupCCTCAGCC           | p.(Pro773Leufs*6)    | <a href="#">Jackson (2020) Am J Med Genet C Semin Med Genet 184, 578</a>                                                                                           |
| c.2456dup                        | p.(Ser820Valfs*12)   | <a href="#">Cross (2020) Am J Med Genet A 182, 2508</a>                                                                                                            |
| c.2497dupC                       | p.(Leu833Profs*137)  | <a href="#">Pérez-Grijalba (2019) Mol Genet Genomic Med 7,</a>                                                                                                     |
| c.2513_2514insGCCA               | p.(Gln839Profs*132)  | <a href="#">Schorry (2008) Am J Med Genet A 146A, 2512</a>                                                                                                         |
| c.2749dupA                       | p.(Thr917Asnfs*53)   | <a href="#">Udaka (2005) Congenit Anom (Kyoto) 45, 125</a>                                                                                                         |
| c.2787dup                        | p.(Pro930Alafs*40)   | <a href="#">Cross (2020) Am J Med Genet A 182, 2508</a>                                                                                                            |
| c.2810dupC                       | p.(Ser938Valfs*32)   | <a href="#">Wincent (2016) Mol Genet Genomic Med 4, 39</a><br><a href="#">Wincent (2016) Mol Genet Genomic Med 4: 367</a>                                          |
| c.2854_2863dup                   | p.(Gln955Argfs*18)   | <a href="#">Cross (2020) Am J Med Genet A 182, 2508</a>                                                                                                            |
| c.2910dup                        | p.(Arg971Glnfs*21)   | <a href="#">Cross (2020) Am J Med Genet A 182, 2508</a>                                                                                                            |
| c.3020_3021dup                   | p.(Pro1008Serfs*15)  | <a href="#">Cross (2020) Am J Med Genet A 182, 2508</a>                                                                                                            |
| c.3096dupT                       | p.(Lys1033*)         | <a href="#">Coupry (2002) J Med Genet 39, 415</a>                                                                                                                  |
| c.3168dup                        | p.(Val1057Serfs*4)   | <a href="#">Cross (2020) Am J Med Genet A 182, 2508</a>                                                                                                            |
| c.3250dupA                       | Not yet available    | <a href="#">Schorry (2008) Am J Med Genet A 146A, 2512</a>                                                                                                         |
| c.3250+1dupG                     | Not yet available    | <a href="#">Spena (2015) Clin Genet 88, 431</a>                                                                                                                    |
| c.3351_3352dupCC                 | p.(Gln1118Profs*13)  | <a href="#">Bentivegna (2006) BMC Med Genet 7, 77</a>                                                                                                              |
| c.3475dupC                       | p.(Leu1159Profs*10)  | <a href="#">Schorry (2008) Am J Med Genet A 146A, 2512</a>                                                                                                         |
| c.3511dupA                       | p.(Thr1171Asnfs*6)   | <a href="#">Schorry (2008) Am J Med Genet A 146A, 2512</a>                                                                                                         |
| c.3545dupC                       | p.(Glu1183Argfs*4)   | <a href="#">Udaka (2005) Congenit Anom (Kyoto) 45, 125</a>                                                                                                         |
| c.3546_3547insCC                 | p.(Glu1183Profs*68)  | <a href="#">Marzuillo (2013) BMC Med Genet 14, 28</a>                                                                                                              |
| c.3824dupT                       | p.(Leu1275Phefs*8)   | <a href="#">Roelfsema (2005) Am J Hum Genet 76, 572</a>                                                                                                            |
| c.3914+4dupA                     | Not yet available    | <a href="#">Van-Gils (2019) Clin Genet 95, 420</a>                                                                                                                 |
| c.4078dup                        | p.(Arg1360Profs*28)  | <a href="#">Cross (2020) Am J Med Genet A 182, 2508</a>                                                                                                            |
| c.4268dupC                       | p.(Pro1424Serfs*13)  | <a href="#">Waszak (2018) Lancet Oncol 19, 785</a>                                                                                                                 |
| c.4321dupC                       | p.(Arg1441Profs*12)  | <a href="#">Bartsch (2005) Hum Genet 117, 485</a>                                                                                                                  |
| c.4458_4459insT                  | p.(His1487Serfs*4)   | <a href="#">Cross (2020) Am J Med Genet A 182, 2508</a>                                                                                                            |
| c.5212_5213insCCTCGGTCCT<br>GCAC | p.(His1738Profs*11)  | <a href="#">Murata (2001) Hum Mol Genet 10,1071</a>                                                                                                                |
| c.4397_4400dupATGT               | p.(Thr1468Cysfs*12)  | <a href="#">Wincent (2016) Mol Genet Genomic Med 4, 39</a>                                                                                                         |
| c.4482dupC                       | p.(Lys1495Glnfs*24)  | <a href="#">Lee (2015) Brain Dev 37, 402</a>                                                                                                                       |
| c.4644_4646dupGTT                | p.(Leu1549dup)       | <a href="#">Herriot (2016) Clin Genet 89, 355</a><br><a href="#">Cross (2020) Am J Med Genet A182: 2508</a>                                                        |
| c.4944dupC                       | p.(Ile1649Hisfs*11)  | <a href="#">Schorry (2008) Am J Med Genet A 146A, 2512</a>                                                                                                         |
| c.5790dup                        | p.(Thr1931Hisfs*35)  | <a href="#">Cross (2020) Am J Med Genet A 182, 2508</a>                                                                                                            |
| c.5793dupC                       | p.(Thr1932Hisfs*34)  | <a href="#">Udaka (2005) Congenit Anom (Kyoto) 45, 125</a>                                                                                                         |
| c.5837dupC                       | p.(Pro1947Thrfs*19)  | <a href="#">Spena (2015) Clin Genet 88, 431</a><br><a href="#">Rokunohe (2016) J Dermatol Sci 83:240</a><br><a href="#">Cross (2020) Am J Med Genet A182: 2508</a> |
| c.5838_5857dup20                 | p.(Pro1953Hisfs*30)  | <a href="#">Spena (2015) Clin Genet 88, 431</a><br><a href="#">Tornese (2015) Clin Endocrinol (Oxf) 83: 437</a>                                                    |
| c.5845dup                        | p.(Ala1949Glyfs*17)  | <a href="#">Cross (2020) Am J Med Genet A 182, 2508</a>                                                                                                            |
| c.5991dupC                       | p.(Val1998Argfs*343) | <a href="#">Spena (2015) Clin Genet 88, 431</a>                                                                                                                    |

|                       |                       |                                                            |
|-----------------------|-----------------------|------------------------------------------------------------|
| c.6044_6050dupGCATGCC | p.(Pro2018Hisfs*325)  | <a href="#">Bartsch (2005) Hum Genet 117, 485</a>          |
| c.6351_6352dupCC      | p.(Gln2118Profs*26)   | <a href="#">Schorry (2008) Am J Med Genet A 146A, 2512</a> |
| c.6113_6137dup        | p.(Ala2047CysfsTer29) | <a href="#">Cross (2020) Am J Med Genet A 182, 2508</a>    |

### Small indels: 7 mutations

| Nucleotide                        | Protein                | Reference                                                 |
|-----------------------------------|------------------------|-----------------------------------------------------------|
| c.139delAins13                    | p.(Asn47delinsSerSer*) | <a href="#">Couprie (2002) J Med Genet 39, 415</a>        |
| c.1129_1131delGTTinsCAATG         | p.(Val377Glnfs*13)     | <a href="#">Yu (2019) Mol Genet Genomic Med 7,</a>        |
| c.2817_2818delinsT                | p.(Ala940Leufs*58)     | <a href="#">Cross (2020) Am J Med Genet A 182, 2508</a>   |
| c.2829_2834delGTCATCins11         | p.(Gln943Hisfs*57)     | <a href="#">Kosaki (2010) Am J Med Genet A 152A, 1844</a> |
| c.3369_3369+6delAGTAAGTinsCA      | Not yet available      | <a href="#">Couprie (2002) J Med Genet 39, 415</a>        |
| c.3504_3527delins3528_3609+30insA | p.(Asn1168LysfsTer32)  | <a href="#">Cross (2020) Am J Med Genet A 182, 2508</a>   |
| c.3659_3660delinsATGGTA           | p.(Thr1220Asnfs*15)    | <a href="#">Cross (2020) Am J Med Genet A 182, 2508</a>   |

### Splicing: 40 mutations

| Nucleotide   | Reference                                                                                                                                                                  |
|--------------|----------------------------------------------------------------------------------------------------------------------------------------------------------------------------|
| c.85+1G>T    | <a href="#">Lopez-Atalaya (2012) J Med Genet 49, 66</a>                                                                                                                    |
| c.1216+1G>A  | <a href="#">Bartsch (2002) J Med Genet 39, 496</a><br><a href="#">Xiong (2015) Science 347: 1254806</a>                                                                    |
| c.1216+2T>A  | <a href="#">Cross (2020) Am J Med Genet A 182, 2508</a>                                                                                                                    |
| c.1573+1G>A  | <a href="#">Cross (2020) Am J Med Genet A 182, 2508</a>                                                                                                                    |
| c.1676+1G>A  | <a href="#">Bartsch (2002) J Med Genet 39, 496</a>                                                                                                                         |
| c.1823+1G>A  | <a href="#">Schorry (2008) Am J Med Genet A 146A, 2512</a><br><a href="#">Xiong (2015) Science 347: 1254806</a>                                                            |
| c.1823+5G>A  | <a href="#">Spena (2015) Clin Genet 88, 431</a><br><a href="#">Strauss (2018) Genet Med 20: 31</a><br><a href="#">Crowgey (2019) J Mol Diagn 21: 687</a>                   |
| c.1941+1G>A  | <a href="#">Schorry (2008) Am J Med Genet A 146A, 2512</a><br><a href="#">Xiong (2015) Science 347: 1254806</a>                                                            |
| c.1941+1G>T  | <a href="#">Yu (2019) Mol Genet Genomic Med 7,</a>                                                                                                                         |
| c.1941+2T>C  | <a href="#">Cross (2020) Am J Med Genet A 182, 2508</a>                                                                                                                    |
| c.2158+1G>A  | <a href="#">Trujillano (2017) Eur J Hum Genet 25, 176</a>                                                                                                                  |
| c.2881-13G>A | <a href="#">Wincent (2016) Mol Genet Genomic Med 4, 39</a><br><a href="#">Lord (2019) Genome Res 29: 159</a>                                                               |
| c.3060+1G>A  | <a href="#">Schorry (2008) Am J Med Genet A 146A, 2512</a><br><a href="#">Xiong (2015) Science 347: 1254806</a>                                                            |
| c.3060+1G>T  | <a href="#">Cross (2020) Am J Med Genet A 182, 2508</a>                                                                                                                    |
| c.3369+1G>T  | <a href="#">Cross (2020) Am J Med Genet A 182, 2508</a>                                                                                                                    |
| c.3609+1G>T  | <a href="#">Pérez-Grijalba (2019) Mol Genet Genomic Med 7,</a>                                                                                                             |
| c.3698+1G>A  | <a href="#">Udaka (2005) Congenit Anom (Kyoto) 45, 125</a>                                                                                                                 |
| c.3698+3A>T  | <a href="#">Couprie (2002) J Med Genet 39, 415</a>                                                                                                                         |
| c.3779+1G>A  | <a href="#">Dauwerse (2016) Eur J Hum Genet 24, 1639</a><br><a href="#">Cross (2020) Am J Med Genet A 182: 2508</a>                                                        |
| c.3779+1G>T  | <a href="#">Li (2017) Zhongguo Dang Dai Er Ke Za Zhi 19, 1155</a><br><a href="#">Cross (2020) Am J Med Genet A 182: 2508</a>                                               |
| c.3779+2T>C  | <a href="#">Dauwerse (2016) Eur J Hum Genet 24, 1639</a>                                                                                                                   |
| c.3779+3A>T  | <a href="#">Dauwerse (2016) Eur J Hum Genet 24, 1639</a>                                                                                                                   |
| c.3779+5G>C  | <a href="#">Dauwerse (2016) Eur J Hum Genet 24, 1639</a>                                                                                                                   |
| c.3837-2A>C  | <a href="#">Van-Gils (2019) Clin Genet 95, 420</a>                                                                                                                         |
| c.3837-2A>G  | <a href="#">Schorry (2008) Am J Med Genet A 146A, 2512</a><br><a href="#">Xiong (2015) Science 347: 1254806</a>                                                            |
| c.3837-2A>T  | <a href="#">Kalkhoven (2003) Hum Mol Genet 12, 441</a><br><a href="#">Xiong (2015) Science 347: 1254806</a>                                                                |
| c.3836+1G>A  | <a href="#">Udaka (2005) Congenit Anom (Kyoto) 45, 125</a><br><a href="#">Xiong (2015) Science 347: 1254806</a><br><a href="#">Cross (2020) Am J Med Genet A 182: 2508</a> |
| c.3836+5G>C  | <a href="#">Kalkhoven (2003) Hum Mol Genet 12, 441</a><br><a href="#">Xiong (2015) Science 347: 1254806</a><br><a href="#">Wincent (2016) Mol Genet Genomic Med 4: 39</a>  |
| c.3915-1G>A  | <a href="#">Roelfsema (2005) Am J Hum Genet 76, 572</a>                                                                                                                    |
| c.3914+1G>A  | <a href="#">Cross (2020) Am J Med Genet A 182, 2508</a>                                                                                                                    |

|             |                                                                                                                           |
|-------------|---------------------------------------------------------------------------------------------------------------------------|
| c.4133+1G>A | <a href="#">Kalkhoven (2003) Hum Mol Genet <b>12</b>, 441</a><br><a href="#">Xiong (2015) Science <b>347</b>: 1254806</a> |
| c.4281-7C>G | <a href="#">Lopez-Atalaya (2012) J Med Genet <b>49</b>, 66</a>                                                            |
| c.4280+2T>C | <a href="#">Coupry (2002) J Med Genet <b>39</b>, 415</a><br><a href="#">Xiong (2015) Science <b>347</b>: 1254806</a>      |
| c.4394+5G>T | <a href="#">Spena (2015) Clin Genet <b>88</b>, 431</a>                                                                    |
| c.4561-5C>G | <a href="#">Coupry (2002) J Med Genet <b>39</b>, 415</a>                                                                  |
| c.4559A>G   | <a href="#">Coupry (2002) J Med Genet <b>39</b>, 415</a>                                                                  |
| c.4560+1G>A | <a href="#">Schorry (2008) Am J Med Genet A <b>146A</b>, 2512</a>                                                         |
| c.4728+1G>A | <a href="#">Bentivegna (2006) BMC Med Genet <b>7</b>, 77</a><br><a href="#">Xiong (2015) Science <b>347</b>: 1254806</a>  |
| c.4890+1G>A | <a href="#">Cross (2020) Am J Med Genet A <b>182</b>, 2508</a>                                                            |
| c.4890+2T>C | <a href="#">Maddirevula (2018) Genet Med <b>20</b>, 12</a>                                                                |

### Gross deletions: 89 mutations

| Description                                                            | Reference                                                            |
|------------------------------------------------------------------------|----------------------------------------------------------------------|
| >120 kb ex. 1-31                                                       | <a href="#">Bartsch (2002) J Med Genet <b>39</b>, 496</a>            |
| >134191bp incl ex. 1-26                                                | <a href="#">Aradhya (2012) Genet Med <b>14</b>, 594</a>              |
| >154855bp incl entire gene                                             | <a href="#">Aradhya (2012) Genet Med <b>14</b>, 594</a>              |
| >155741bp incl entire gene                                             | <a href="#">Aradhya (2012) Genet Med <b>14</b>, 594</a>              |
| >20113bp incl ex. 4-6                                                  | <a href="#">Aradhya (2012) Genet Med <b>14</b>, 594</a>              |
| >285bp incl ex. 16                                                     | <a href="#">Aradhya (2012) Genet Med <b>14</b>, 594</a>              |
| >560 kb                                                                | <a href="#">Coupry (2002) J Med Genet <b>39</b>, 415</a>             |
| >903bp incl ex. 2                                                      | <a href="#">Aradhya (2012) Genet Med <b>14</b>, 594</a>              |
| >9877bp incl ex. 17-21                                                 | <a href="#">Aradhya (2012) Genet Med <b>14</b>, 594</a>              |
| ~120 kb incl. ex. 6-31 + entire <i>TRAP1</i>                           | <a href="#">Md Ahid (2012) J Med Case Rep <b>6</b>, 30</a>           |
| ~240kb                                                                 | <a href="#">Wincent (2016) Mol Genet Genomic Med <b>4</b>, 39</a>    |
| 0.5-2 kb, ex. 27-28                                                    | <a href="#">Boone (2010) Hum Mutat <b>31</b>, 1326</a>               |
| 0.93-9 kb ex. 22 to IVS23                                              | <a href="#">Rusconi (2015) Hum Genet <b>134</b>, 613</a>             |
| 1.35-1.38 Mb incl. entire gene +27 others                              | <a href="#">Rusconi (2015) Hum Genet <b>134</b>, 613</a>             |
| 1.4 Mb                                                                 | <a href="#">Alabdullatif (2017) Clin Genet <b>91</b>, 616</a>        |
| 10,916 bp IVS13-342_IVS16+7306                                         | <a href="#">Udaka (2006) Genet Test <b>10</b>, 265</a>               |
| 147 kb partial gene                                                    | <a href="#">Asadollahi (2014) J Med Genet <b>51</b>, 677</a>         |
| 148 bp nt. 86                                                          | <a href="#">Bartsch (2002) J Med Genet <b>39</b>, 496</a>            |
| 150 kb incl. entire gene                                               | <a href="#">Gervasini (2007) Genomics <b>90</b>, 567</a>             |
| 154-164 kb ex. 22-31 + <i>TRAP1</i> + <i>DNASE1</i> +part <i>SLX4</i>  | <a href="#">Rusconi (2015) Hum Genet <b>134</b>, 613</a>             |
| 17-27 kb ex. 1-IVS1                                                    | <a href="#">Rusconi (2015) Hum Genet <b>134</b>, 613</a>             |
| 194-208 kb 5-UTR to ex. 31                                             | <a href="#">Rusconi (2015) Hum Genet <b>134</b>, 613</a>             |
| 2.6 Mb incl. entire gene                                               | <a href="#">Gervasini (2007) Genomics <b>90</b>, 567</a>             |
| 210kb incl 5' half of gene                                             | <a href="#">Kosaki (2011) Am J Med Genet A <b>155</b>,1189</a>       |
| 23 bp, c.6395_6417                                                     | <a href="#">Cross (2020) Am J Med Genet A <b>182</b>,2508</a>        |
| 25 bp, c.6113_6137                                                     | <a href="#">Cross (2020) Am J Med Genet A <b>182</b>,2508</a>        |
| 28-43 kb ex. 4-16                                                      | <a href="#">Rusconi (2015) Hum Genet <b>134</b>, 613</a>             |
| 3' end of gene incl. ex. 17-31                                         | <a href="#">Coupry (2002) J Med Genet <b>39</b>, 415</a>             |
| 3' gene                                                                | <a href="#">Blough (2000) Am J Med Genet <b>90</b>, 29</a>           |
| 360 kb incl. ex. 1-2                                                   | <a href="#">Bourdeaut (2014) Pediatr Blood Cancer <b>61</b>, 383</a> |
| 37 bp, c.662_698                                                       | <a href="#">Cross (2020) Am J Med Genet A <b>182</b>,2508</a>        |
| 394-413 kb from IVS2 +7 other genes                                    | <a href="#">Rusconi (2015) Hum Genet <b>134</b>, 613</a>             |
| 398.43 kb incl. ex. 22-31 + <i>SLX4</i> + <i>DNASE1</i> + <i>TRAP1</i> | <a href="#">Al-Qattan (2020) Case Rep Genet <b>2020</b>6143050</a>   |
| 480-494 kb incl. entire gene + 7 others                                | <a href="#">Rusconi (2015) Hum Genet <b>134</b>, 613</a>             |
| 5-16 kb incl. ex. 31                                                   | <a href="#">Rusconi (2015) Hum Genet <b>134</b>, 613</a>             |
| 5-6 kb incl ex. 27-28                                                  | <a href="#">Tsai (2011) Eur J Hum Genet <b>19</b>, 43</a>            |
| 5' gene                                                                | <a href="#">Blough (2000) Am J Med Genet <b>90</b>, 29</a>           |
| 500 kb incl. entire gene                                               | <a href="#">Gervasini (2007) Genomics <b>90</b>, 567</a>             |
| 520.7 kb incl. entire gene + <i>ADCY9</i> + <i>SRL</i>                 | <a href="#">Wójcik (2010) Am J Med Genet A <b>152A</b>, 479</a>      |
| 59-64 kb ex. 29-31 to IVS10 <i>TRAP1</i>                               | <a href="#">Rusconi (2015) Hum Genet <b>134</b>, 613</a>             |
| 6-10 kb IVS11-ex. 15                                                   | <a href="#">Rusconi (2015) Hum Genet <b>134</b>, 613</a>             |
| 61,640 bp IVS3+10556_IVS26+149                                         | <a href="#">Udaka (2006) Genet Test <b>10</b>, 265</a>               |
| 65-70 kb ex. 12-31 to IVS1 <i>TRAP1</i>                                | <a href="#">Rusconi (2015) Hum Genet <b>134</b>, 613</a>             |
| 713 bp, ex. 2                                                          | <a href="#">Petrij (2000) J Med Genet <b>37</b>, 168</a>             |
| 741-760 kb incl. entire gene + 9 others                                | <a href="#">Rusconi (2015) Hum Genet <b>134</b>, 613</a>             |
| 81.4kb incl ex. 29-31, <i>DNASE1</i> and <i>TRAP1</i>                  | <a href="#">Lai (2012) Gene <b>499</b>, 182</a>                      |



|                                                   |                                                                       |
|---------------------------------------------------|-----------------------------------------------------------------------|
| 84-98 kb incl. ex. 1-2                            | <a href="#">Rusconi (2015) Hum Genet <b>134</b>, 613</a>              |
| 9-24 kb around ex. 2                              | <a href="#">Isidor (2010) Am J Med Genet A <b>152A</b>,1847</a>       |
| c.4133-154_-2del153                               | <a href="#">Schorry (2008) Am J Med Genet A <b>146A</b>, 2512</a>     |
| codons 267-2443                                   | <a href="#">Bartsch (1999) Eur J Hum Genet <b>7</b>, 748</a>          |
| codons 822-2443                                   | <a href="#">Bartsch (1999) Eur J Hum Genet <b>7</b>, 748</a>          |
| entire gene                                       | <a href="#">Fokstuen (2016) Hum Genomics <b>10</b>, 24</a>            |
| ex. 1                                             | <a href="#">Roelfsema (2005) Am J Hum Genet <b>76</b>,572</a>         |
| ex. 1                                             | <a href="#">Balci (2010) Am J Med Genet A <b>152A</b>,1036</a>        |
| ex. 1-16                                          | <a href="#">Udaka (2006) Genet Test <b>10</b>, 265</a>                |
| ex. 1-19                                          | <a href="#">Roelfsema (2005) Am J Hum Genet <b>76</b>,572</a>         |
| ex. 1-2                                           | <a href="#">Roelfsema (2005) Am J Hum Genet <b>76</b>,572</a>         |
| ex. 12-31                                         | <a href="#">Yu (2019) Mol Genet Genomic Med <b>7</b>,</a>             |
| ex. 13-16                                         | <a href="#">Yu (2019) Mol Genet Genomic Med <b>7</b>,</a>             |
| ex. 14-31                                         | <a href="#">Saettini (2020) J Clin Immunol <b>40</b>, 851</a>         |
| ex. 17-21                                         | <a href="#">Cali (2013) Genet Mol Res <b>12</b>, 2809</a>             |
| ex. 2-3                                           | <a href="#">Saettini (2020) J Clin Immunol <b>40</b>, 851</a>         |
| ex. 21                                            | <a href="#">Pérez-Grijalba (2019) Mol Genet Genomic Med <b>7</b>,</a> |
| ex. 21-28                                         | <a href="#">Yu (2019) Mol Genet Genomic Med <b>7</b>,</a>             |
| ex. 22-23                                         | <a href="#">Yu (2019) Mol Genet Genomic Med <b>7</b>,</a>             |
| ex. 24-31                                         | <a href="#">Pérez-Grijalba (2019) Mol Genet Genomic Med <b>7</b>,</a> |
| ex. 26-30                                         | <a href="#">Pérez-Grijalba (2019) Mol Genet Genomic Med <b>7</b>,</a> |
| ex. 28-31                                         | <a href="#">Zimmermann (2007) Eur J Hum Genet <b>15</b>, 837</a>      |
| ex. 29-30                                         | <a href="#">Pérez-Grijalba (2019) Mol Genet Genomic Med <b>7</b>,</a> |
| ex. 29-31                                         | <a href="#">Saettini (2020) J Clin Immunol <b>40</b>, 851</a>         |
| ex. 3-31                                          | <a href="#">Pérez-Grijalba (2019) Mol Genet Genomic Med <b>7</b>,</a> |
| ex. 31                                            | <a href="#">Roelfsema (2005) Am J Hum Genet <b>76</b>,572</a>         |
| ex. 5-31                                          | <a href="#">Udaka (2006) Genet Test <b>10</b>, 265</a>                |
| ex. 6-31                                          | <a href="#">Lee (2015) Brain Dev <b>37</b>, 402</a>                   |
| incl. entire gene                                 | <a href="#">Blough (2000) Am J Med Genet <b>90</b>, 29</a>            |
| incl. entire gene + <i>TRAP1</i> and <i>ADCY9</i> | <a href="#">Wu (2020) Orphanet J Rare Dis <b>15</b>, 101</a>          |
| incl. ex. 12                                      | <a href="#">Coupry (2004) Hum Mutat <b>23</b>, 278</a>                |
| incl. ex. 17-28                                   | <a href="#">Cross (2020) Am J Med Genet A <b>182</b>,2508</a>         |
| incl. ex. 2                                       | <a href="#">Coupry (2004) Hum Mutat <b>23</b>, 278</a>                |
| incl. ex. 2-3                                     | <a href="#">Cross (2020) Am J Med Genet A <b>182</b>,2508</a>         |
| incl. ex. 24-28                                   | <a href="#">Cross (2020) Am J Med Genet A <b>182</b>,2508</a>         |
| incl. ex. 27-29                                   | <a href="#">Cross (2020) Am J Med Genet A <b>182</b>,2508</a>         |
| incl. ex. 29-31                                   | <a href="#">Cross (2020) Am J Med Genet A <b>182</b>,2508</a>         |
| incl. ex. 30                                      | <a href="#">Coupry (2004) Hum Mutat <b>23</b>, 278</a>                |
| incl. ex. 6-13                                    | <a href="#">Cross (2020) Am J Med Genet A <b>182</b>,2508</a>         |
| incl. ex. 7-8                                     | <a href="#">Cross (2020) Am J Med Genet A <b>182</b>,2508</a>         |
| incl. ex. 9-14                                    | <a href="#">Cross (2020) Am J Med Genet A <b>182</b>,2508</a>         |
| incl. mid-3' gene                                 | <a href="#">Blough (2000) Am J Med Genet <b>90</b>, 29</a>            |
| N-*inal region of gene                            | <a href="#">Coupry (2002) J Med Genet <b>39</b>, 415</a>              |

### Gross insertions: 2 mutations

| Description  | Reference                                                             |
|--------------|-----------------------------------------------------------------------|
| ex. 1        | <a href="#">Roelfsema (2005) Am J Hum Genet <b>76</b>, 572</a>        |
| ex. 14-19dup | <a href="#">Pérez-Grijalba (2019) Mol Genet Genomic Med <b>7</b>,</a> |

### Complex rearrangements: 3 mutations

| Description                           | Reference                                                         |
|---------------------------------------|-------------------------------------------------------------------|
| Translocation breakpoints within gene | <a href="#">Petrij (1995) Nature <b>376</b>, 348</a>              |
| Translocation t(1;16)(p36.2;p13.3)    | <a href="#">Kim (2013) Ann Clin Lab Sci <b>43</b>, 450</a>        |
| Translocation t(2;16)(q36.3;p13.3)    | <a href="#">Petrij (2000) J Med Genet <b>37</b>, 168</a>          |
|                                       | <a href="#">Torres (2010) Clinics (Sao Paulo) <b>65</b>: 107</a>  |
|                                       | <a href="#">Rivera (2011) Clinics (Sao Paulo) <b>66</b>: 1833</a> |

**Table S2: All of 110 *EP300* mutations causing Rubinstein-Taybi syndrome type 2 listed in HGMDPro variant database and reported in the literature (called the 04/27/2021)**

| <b>Missense/nonsense: 38 mutations</b> |                   |                                                                                                                                                                        |
|----------------------------------------|-------------------|------------------------------------------------------------------------------------------------------------------------------------------------------------------------|
| <b>Nucleotide</b>                      | <b>Protein</b>    | <b>Reference</b>                                                                                                                                                       |
| c.256C>T                               | p.(Arg86*)        | <a href="#">Fergelot (2016) Am J Med Genet A 170, 3069</a>                                                                                                             |
| c.1092C>A                              | p.(Cys364*)       | <a href="#">Maddirevula (2018) Genet Med 20, 12</a><br><a href="#">Shaheen (2019) Genet Med 21: 545</a>                                                                |
| c.1282C>T                              | p.(Pro428Ser)     | <a href="#">Tamhankar (2015) Indian J Pediatr 83, 473</a><br><a href="#">Negri (2017) Indian J Pediatr 84: 91</a>                                                      |
| c.1833T>G                              | p.(Tyr611*)       | <a href="#">Negri (2016) Hum Mutat 37, 175</a>                                                                                                                         |
| c.1876C>T                              | p.(Arg626*)       | <a href="#">Negri (2016) Hum Mutat 37, 175</a>                                                                                                                         |
| c.1942C>T                              | p.(Arg648*)       | <a href="#">Roelfsema (2005) Am J Hum Genet 76, 572</a><br><a href="#">Xiong (2015) Science 347: 1254806</a>                                                           |
| c.1957C>T                              | p.(Gln653*)       | <a href="#">Cross (2020) Am J Med Genet A 182, 2508</a>                                                                                                                |
| c.2113C>T                              | p.(Arg705*)       | <a href="#">Fergelot (2016) Am J Med Genet A 170, 3069</a>                                                                                                             |
| c.2221C>T                              | p.(Gln741*)       | <a href="#">Sequeo (2020) J Med Genet 57, 760</a>                                                                                                                      |
| c.2377C>T                              | p.(Gln793*)       | <a href="#">Negri (2016) Hum Mutat 37, 175</a>                                                                                                                         |
| c.2437C>T                              | p.(Gln813*)       | <a href="#">Negri (2016) Hum Mutat 37, 175</a>                                                                                                                         |
| c.2554C>T                              | p.(Gln852*)       | <a href="#">Fergelot (2016) Am J Med Genet A 170, 3069</a>                                                                                                             |
| c.3163C>T                              | p.(Arg1055*)      | <a href="#">López (2018) BMC Med Genet 19, 36</a>                                                                                                                      |
| c.3764A>G                              | p.(His1255Arg)    | <a href="#">Welters (2019) Eur J Endocrinol ,</a>                                                                                                                      |
| c.3763C>G                              | p.(His1255Asp)    | <a href="#">Jagla (2017) Clin Dysmorphol 26, 170</a>                                                                                                                   |
| c.3829A>T                              | p.(Lys1277*)      | <a href="#">Negri (2016) Hum Mutat 37, 175</a><br><a href="#">Fergelot (2016) Am J Med Genet A 170: 3069</a>                                                           |
| c.3857A>G                              | p.(Asn1286Ser)    | <a href="#">Fergelot (2016) Am J Med Genet A 170, 3069</a><br><a href="#">Cross (2020) Am J Med Genet A 182: 2508</a>                                                  |
| c.3934C>T                              | p.(Arg1312*)      | <a href="#">Negri (2015) Clin Genet 87, 148</a>                                                                                                                        |
| c.4066C>T                              | p.(Arg1356*)      | <a href="#">Fergelot (2016) Am J Med Genet A 170, 3069</a>                                                                                                             |
| c.4173G>C                              | p.(Arg1391Ser)    | <a href="#">Cross (2020) Am J Med Genet A 182, 2508</a>                                                                                                                |
| c.4232C>T                              | p.(Thr1411Ile)    | <a href="#">Negri (2016) Hum Mutat 37, 175</a>                                                                                                                         |
| c.4238T>A                              | p.(Val1413Asp)    | <a href="#">Fergelot (2016) Am J Med Genet A 170, 3069</a>                                                                                                             |
| c.4301A>G                              | p.(His1434Arg)    | <a href="#">Fergelot (2016) Am J Med Genet A 170, 3069</a>                                                                                                             |
| c.4363C>T                              | p.(Gln1455*)      | <a href="#">Costain (2018) Eur J Med Genet 61, 125</a>                                                                                                                 |
| c.4390C>T                              | p.(Gln1464*)      | <a href="#">Fergelot (2016) Am J Med Genet A 170, 3069</a><br><a href="#">Cross (2020) Am J Med Genet A 182: 2508</a>                                                  |
| c.4505C>T                              | p.(Pro1502Leu)    | <a href="#">Welters (2019) Eur J Endocrinol ,</a>                                                                                                                      |
| c.4511T>G                              | p.(Phe1504Cys)    | <a href="#">López (2018) BMC Med Genet 19, 36</a>                                                                                                                      |
| c.4585C>T                              | p.(Arg1529*)      | <a href="#">Negri (2016) Hum Mutat 37, 175</a>                                                                                                                         |
| c.4763T>C                              | p.(Met1588Thr)    | <a href="#">Saettini (2018) Pediatr Allergy Immunol epub, epub</a>                                                                                                     |
| c.4774A>T                              | p.(Lys1592*)      | <a href="#">Fergelot (2016) Am J Med Genet A 170, 3069</a>                                                                                                             |
| c.4783T>G                              | p.(Phe1595Val)    | <a href="#">Retterer (2016) Genet Med 18, 696</a><br><a href="#">Hamilton (2016) Clin Dysmorphol 25: 135</a><br><a href="#">Costain (2018) Eur J Med Genet 61: 125</a> |
| c.4933C>T                              | p.(Arg1645*)      | <a href="#">Solomon (2015) Am J Med Genet A 167, 1111</a><br><a href="#">Fergelot (2016) Am J Med Genet A 170: 3069</a>                                                |
| c.4946G>A                              | p.(Trp1649*)      | <a href="#">Fergelot (2016) Am J Med Genet A 170, 3069</a>                                                                                                             |
| c.4967T>C                              | p.(Val1656Ala)    | <a href="#">Kosaki (2020) Am J Med Genet A 182, 1601</a>                                                                                                               |
| c.5471A>C                              | p.(Gln1824Pro)    | <a href="#">Hamilton (2016) Clin Dysmorphol 25, 135</a><br><a href="#">Menke (2018) Am J Med Genet A 176: 862</a>                                                      |
| c.5492G>C                              | p.(Arg1831Thr)    | <a href="#">Liu (2019) N Engl J Med 380, 2478</a>                                                                                                                      |
| c.5506C>T                              | p.(Gln1836*)      | <a href="#">Fergelot (2016) Am J Med Genet A 170, 3069</a>                                                                                                             |
| c.5824A>T                              | p.(Met1942Leu)    | <a href="#">Wincent (2016) Mol Genet Genomic Med 4, 39</a><br><a href="#">Fergelot (2016) Am J Med Genet A 170: 3069</a>                                               |
| <b>Small deletions: 35 mutations</b>   |                   |                                                                                                                                                                        |
| <b>Nucleotide</b>                      | <b>Protein</b>    | <b>Reference</b>                                                                                                                                                       |
| c.70_71delTC                           | p.(Ser24Glyfs*14) | <a href="#">López (2018) BMC Med Genet 19, 36</a>                                                                                                                      |
| c.104_107delCTCT                       | p.(Ser35Tyrfs*12) | <a href="#">Woods (2014) Am J Med Genet A 164, 251</a><br><a href="#">Fergelot (2016) Am J Med Genet A 170: 3069</a><br><a href="#">Boissel (2017) Genet Med :</a>     |

|                         |                              |                                                                                                                                                                   |
|-------------------------|------------------------------|-------------------------------------------------------------------------------------------------------------------------------------------------------------------|
| c.494_497delTGAA        | p.(Met165Thrfs*4)            | <a href="#">Bounakis (2015) J Med Case Rep 9, 10</a><br><a href="#">Cross (2020) Am J Med Genet A 182: 2508</a>                                                   |
| c.638delG               | p.(Gly213Glufs*7)            | <a href="#">Bartsch (2010) Am J Med Genet A 152A, 181</a><br><a href="#">Fergelot (2016) Am J Med Genet A 170: 3069</a>                                           |
| c.659_662delCTGA        | p.(Thr220Serfs*16)           | <a href="#">Hamilton (2016) Clin Dysmorphol 25, 135</a>                                                                                                           |
| c.1140_1143delACAC      | p.(His381Alafs*49)           | <a href="#">Hu (2018) Genet Med 20,1045</a>                                                                                                                       |
| c.1371_1374delTCAG      | p.(Ser457Argfs*7)            | <a href="#">Negri (2016) Hum Mutat 37, 175</a>                                                                                                                    |
| c.1407delA              | p.(Ala470Leufs*8)            | <a href="#">Dillon (2018) Eur J Hum Genet 26, 644</a>                                                                                                             |
| c.1975_1976delCC        | p.(Pro659Lysfs*15)           | <a href="#">Fergelot (2016) Am J Med Genet A 170, 3069</a>                                                                                                        |
| c.2251_2257delTATGGGC   | p.(Tyr751Leufs*23)           | <a href="#">Fergelot (2016) Am J Med Genet A 170, 3069</a><br><a href="#">Cross (2020) Am J Med Genet A 182: 2508</a>                                             |
| c.2446delC              | p.(His816Thrfs*34)           | <a href="#">Masuda (2015) Mol Syndromol 6, 99</a>                                                                                                                 |
| c.2525del               | p.(Pro842Leufs* 8)           | <a href="#">Sequeo (2020) J Med Genet 57, 760</a>                                                                                                                 |
| c.2877_2884delCACAGAAG  | p.(Thr960Glufs*7)            | <a href="#">Roelfsema (2005) Am J Hum Genet 76, 572</a>                                                                                                           |
| c.2966delC              | p.(Pro989Glnfs*31)           | <a href="#">Negri (2016) Hum Mutat 37, 175</a>                                                                                                                    |
| c.3071_3074delAAGA      | p.(Lys1024Argfs*34)          | <a href="#">Fergelot (2016) Am J Med Genet A 170, 3069</a>                                                                                                        |
| c.3093delT              | p.(Ser1031Argfs*28)          | <a href="#">Luyckx (2019) Eur J Med Genet 62, 96</a>                                                                                                              |
| c.3234delT              | p.(Val1079Trpfs*6)           | <a href="#">Fergelot (2016) Am J Med Genet A 170, 3069</a>                                                                                                        |
| c.3367delC              | p.(Met1124Cysfs*33)          | <a href="#">Cross (2020) Am J Med Genet A 182, 2508</a>                                                                                                           |
| c.3438_3439delTG        | p.(Glu1147Glyfs*3)           | <a href="#">Fergelot (2016) Am J Med Genet A 170, 3069</a><br><a href="#">Cross (2020) Am J Med Genet A 182: 2508</a>                                             |
| c.3625delC              | p.(Gln1209Lysfs*18)          | <a href="#">Bartholdi (2007) J Med Genet 44, 327</a>                                                                                                              |
| c.3661delC              | p.(Gln1221Serfs*6)           | <a href="#">Hamilton (2016) Clin Dysmorphol 25, 135</a><br><a href="#">Fitzgerald (2015) Nature 519: 223</a><br><a href="#">Kosmicki (2017) Nat Genet 49: 504</a> |
| c.4078_4086delCTCTTTGCC | p.(Leu1360_Ala1362del)       | <a href="#">Fergelot (2016) Am J Med Genet A 170, 3069</a>                                                                                                        |
| c.4296_4297delAG        | p.(Gly1433Alafs*9)           | <a href="#">Ishiwa (2019) Pediatr Nephrol epub, epub</a>                                                                                                          |
| c.4354_4359delCCTCCT    | p.(Pro1452_Pro1453del)       | <a href="#">Fergelot (2016) Am J Med Genet A 170, 3069</a>                                                                                                        |
| c.4371_4376delACCCAA    | p.(Ile1457_Lys1459delinsMet) | <a href="#">Fergelot (2016) Am J Med Genet A 170, 3069</a>                                                                                                        |
| c.4764_4765delGG        | p.(Met1588Ilefs*4)           | <a href="#">Fergelot (2016) Am J Med Genet A 170, 3069</a>                                                                                                        |
| c.4783_4784delTT        | p.(Phe1595Leufs*19)          | <a href="#">Wincent (2016) Mol Genet Genomic Med 4, 39</a><br><a href="#">Fergelot (2016) Am J Med Genet A 170: 3069</a>                                          |
| c.5578_5584delGGCCAAC   | p.(Gly1860Serfs*44)          | <a href="#">Cross (2020) Am J Med Genet A 182, 2508</a>                                                                                                           |
| c.5698_5714del17        | p.(Lys1900Aspfs*167)         | <a href="#">Hadzsiev (2019) Clin Dysmorphol 28, 137</a>                                                                                                           |
| c.5873delC              | p.(Pro1958Argfs*2)           | <a href="#">Hamilton (2016) Clin Dysmorphol 25, 135</a>                                                                                                           |
| c.6347delC              | p.(Pro2116Leufs*18)          | <a href="#">Fergelot (2016) Am J Med Genet A 170, 3069</a>                                                                                                        |
| c.6574_6585del12        | p.(Gln2192_Gln2195del)       | <a href="#">Fieremans (2016) Hum Mutat 37, 804</a>                                                                                                                |
| c.6627_6638del12        | p.(Asn2209_Gln2213delinsLys) | <a href="#">López (2018) BMC Med Genet 19, 36</a>                                                                                                                 |
| c.7100delC              | p.(Pro2367Argfs*36)          | <a href="#">Zimmermann (2007) Eur J Hum Genet 15, 837</a>                                                                                                         |
| c.7222_7223delCA        | p.(Gln2408Glufs*39)          | <a href="#">López (2016) BMC Med Genet 17, 97</a>                                                                                                                 |

### Small insertions: 13 mutations

| Nucleotide         | Protein              | Reference                                                                                                                                                            |
|--------------------|----------------------|----------------------------------------------------------------------------------------------------------------------------------------------------------------------|
| c.638dupG          | p.(Ser214Lysfs*8)    | <a href="#">Baker (2019) J Mol Diagn 21, 38</a>                                                                                                                      |
| c.669dupT          | p.(Gln224Serfs*20)   | <a href="#">Negri (2015) Clin Genet 87, 148</a><br><a href="#">Fergelot (2016) Am J Med Genet A 170: 3069</a>                                                        |
| c.718dupC          | p.(Gln240Profs*4)    | <a href="#">Negri (2016) Hum Mutat 37, 175</a>                                                                                                                       |
| c.1167dupA         | p.(Val390Serfs*21)   | <a href="#">Fergelot (2016) Am J Med Genet A 170, 3069</a>                                                                                                           |
| c.1554_1555dupAG   | p.(Gly519Glufs*3)    | <a href="#">Fergelot (2016) Am J Med Genet A 170, 3069</a>                                                                                                           |
| c.4578_4579insTT   | p.(Arg1527Leufs*15)  | <a href="#">Fergelot (2016) Am J Med Genet A 170, 3069</a>                                                                                                           |
| c.4640dupA         | p.(Asn1547Lysfs*3)   | <a href="#">Negri (2016) Hum Mutat 37, 175</a><br><a href="#">Fergelot (2016) Am J Med Genet A 170: 3069</a>                                                         |
| c.4652dupA         | p.(Asn1552Glufs*2)   | <a href="#">Negri (2015) Clin Genet 87, 148</a>                                                                                                                      |
| c.4912dupC         | p.(His1638Profs*35)  | <a href="#">Fergelot (2016) Am J Med Genet A 170, 3069</a><br><a href="#">Fitzgerald (2015) Nature 519: 223</a><br><a href="#">Kosmicki (2017) Nat Genet 49: 504</a> |
| c.4954_4957dupATGT | p.(Cys1653Tyrfs*21)  | <a href="#">Fergelot (2016) Am J Med Genet A 170, 3069</a><br><a href="#">McRae (2017) Nature 542: 433</a>                                                           |
| c.5630_5631insGGTA | p.(Thr1878Valfs*6)   | <a href="#">Diets (2018) Clin Cancer Res 24, 1594</a>                                                                                                                |
| c.5723dupC         | p.(Thr1909Asnfs*164) | <a href="#">Stavropoulos (2016) NPJ Genom Med 1, 15012</a><br><a href="#">Costain (2018) Eur J Med Genet 61: 125</a>                                                 |

|            |                      |                                                                     |
|------------|----------------------|---------------------------------------------------------------------|
| c.5783dupT | p.(Met1928Ilefs*145) | <a href="#">Jezela-Stanek (2020) Mol Genet Genomic Med 8, e1263</a> |
|------------|----------------------|---------------------------------------------------------------------|

#### Small indels: 4 mutations

| Nucleotide               | Protein)                     | Reference                                                  |
|--------------------------|------------------------------|------------------------------------------------------------|
| c.41_51del11insT         | p.(Lys14Ilefs*31)            | <a href="#">Negri (2015) Clin Genet 87, 148</a>            |
| c.1187_1189delCTCinsATT  | p.(Ser396_Arg397delinsTyr*)  | <a href="#">Negri (2016) Hum Mutat 37, 175</a>             |
| c.3507_3511delGTTCTinsAG | p.(Phe1170_Ser1171delinsAla) | <a href="#">Fergelot (2016) Am J Med Genet A 170, 3069</a> |
| c.1606_1610delins31      | p.(Ala536Tyrfs*5)            | <a href="#">Cross (2020) Am J Med Genet A 182, 2508</a>    |

#### Splicing: 6 mutations

| Nucleotide   | Reference                                                                                                    |
|--------------|--------------------------------------------------------------------------------------------------------------|
| c.1879-12A>G | <a href="#">Negri (2016) Hum Mutat 37, 175</a><br><a href="#">Fergelot (2016) Am J Med Genet A 170: 3069</a> |
| c.2053+1G>C  | <a href="#">Fergelot (2016) Am J Med Genet A 170, 3069</a>                                                   |
| c.3501+1G>A  | <a href="#">Negri (2015) Clin Genet 87, 148</a>                                                              |
| c.3728+5G>C  | <a href="#">Fergelot (2016) Am J Med Genet A 170, 3069</a>                                                   |
| c.4026-9A>G  | <a href="#">Fergelot (2016) Am J Med Genet A 170, 3069</a>                                                   |
| c.4287-1G>A  | <a href="#">Negri (2016) Hum Mutat 37, 175</a>                                                               |

#### Gross deletions: 14 mutations

| Description                                     | Reference                                                  |
|-------------------------------------------------|------------------------------------------------------------|
| 2-5 kb, ex. 24-27                               | <a href="#">Boone (2010) Hum Mutat 31, 1326</a>            |
| 376 kb                                          | <a href="#">Magini (2019) Gene 706, 162</a>                |
| 376 kb, entire gene                             | <a href="#">Negri (2016) Hum Mutat 37, 175</a>             |
| 4.43 kb incl ex. 24-27                          | <a href="#">Tsai (2011) Eur J Hum Genet 19, 43</a>         |
| 625 kb incl. entire gene                        | <a href="#">Novo-Filho (2020) Meta Gene 24 100702</a>      |
| ex. 1                                           | <a href="#">Roelfsema (2005) Am J Hum Genet 76, 572</a>    |
| ex. 12-21                                       | <a href="#">López (2018) BMC Med Genet 19, 36</a>          |
| ex. 17-18                                       | <a href="#">Negri (2015) Clin Genet 87, 148</a>            |
| ex. 17-19, c.(3142+1_3143-1)_(3590+1_3591-1)del | <a href="#">Negri (2016) Hum Mutat 37, 175</a>             |
| ex. 24-29, c.(3874+1_3875-1)_(4779+1_4780-1)del | <a href="#">Negri (2016) Hum Mutat 37, 175</a>             |
| ex. 3-8                                         | <a href="#">Foley (2009) Am J Med Genet A 149A, 997</a>    |
| ex. 7                                           | <a href="#">Fergelot (2016) Am J Med Genet A 170, 3069</a> |
| incl. ex. 20-23                                 | <a href="#">Fergelot (2016) Am J Med Genet A 170, 3069</a> |
| incl. ex. 4-8                                   | <a href="#">Cross (2020) Am J Med Genet A 182, 2508</a>    |



**Table S3: All of 45 *CREBBP* and 8 *EP300* unpublished mutations causing Rubinstein-Taybi syndrome type 1 and type 2 respectively, listed in LOVD database (called the 04/27/2021)**

***CREBBP* mutations: 45**

| Nucleotide                           | Protein                     | Reference          |
|--------------------------------------|-----------------------------|--------------------|
| c.(?-204)_(798-1_799+1)del           | p.0?                        | Martine van Belzen |
| c.37A>G                              | p.(Lys13Glu)                | Martine van Belzen |
| c.(85+1_86-1)_(798+1_799-1)del       | p.(del)                     | Martine van Belzen |
| c.86_233del                          | p.(Asp29fs)                 | Johan den Dunnen   |
| c.180_181insTAAA                     | p.(Pro61*)                  | VKGL-NL_VUmc       |
| c.181_182insAAGGTTTAA                | p.(Pro61delinsGlnGlyLeuThr) | VKGL-NL_VUmc       |
| c.277dup                             | p.(Ser93Lysfs*19)           | Martine van Belzen |
| c.299del                             | p.(Gly100Valfs*24)          | Mohammed Faruq     |
| c.708dup                             | p.(Ser237Glnfs*5)           | VKGL-NL_Nijmegen   |
| c.881dup                             | p.(Asn294Lysfs*56)          | Johan den Dunnen   |
| c.1011dup                            | p.(Gln338Thrfs*12)          | Martine van Belzen |
| c.1114C>T                            | p.(Gln372*)                 | Martine van Belzen |
| c.1257G>A                            | p.(Trp419*)                 | Mohammed Faruq     |
| c.1388_1395del                       | p.(Gly463Glufs*7)           | Martine van Belzen |
| c.1412_1415del                       | p.(Ser471Thrfs*5)           | Martine van Belzen |
| c.1522C>T                            | p.(Gln508*)                 | Martine van Belzen |
| c.1655del                            | p.(Pro552Argfs*10)          | Martine van Belzen |
| c.1802G>A                            | p.(Arg601Gln)               | Gwenaél Le Guyader |
| c.2283+1G>A                          | p.?                         | VKGL-NL_Nijmegen   |
| c.2650_2663dup                       | p.(Ser889Leufs*43)          | Johan den Dunnen   |
| c.2724del                            | p.(Ser908Argfs*19)          | Martine van Belzen |
| c.2879del                            | p.(Pro960Argfs*38)          | Martine van Belzen |
| c.(3060+1_3061-1)_(3698+1_3699-1)del | p.(del)                     | Martine van Belzen |
| c.3375T>G                            | p.(Tyr1125*)                | Martine van Belzen |
| c.3546del                            | p.(Glu1183Argfs*67)         | Martine van Belzen |
| c.3547G>T                            | p.(Glu1183*)                | Martine van Belzen |
| c.3610-2A>G                          | p.(?)                       | Martine van Belzen |
| c.3610-1G>A                          | p.(?)                       | Martine van Belzen |
| c.3817_3821dup                       | p.(Leu1275Ilefs*3)          | Martine van Belzen |
| c.(3836-1_3837-1)_(3982+1_3983-1)del | p.(del)                     | Martine van Belzen |
| c.3862_3871del                       | p.(Arg1288fs)               | Martine van Belzen |
| c.3914+1G>T                          | p.(?)                       | Martine van Belzen |
| c.(3982+1_3983-1)_(?2664_?)del       | p.?                         | Martine van Belzen |
| c.3993del                            | p.(Thr1332Glnfs*11)         | Mohammed Faruq     |
| c.4134-1G>T                          | p.?                         | VKGL-NL_Nijmegen   |
| c.4319_4320del                       | p.(Phe1440Serfs*12)         | Johan den Dunnen   |
| c.4396_4406del                       | p.(Tyr1466fs)               | Martine van Belzen |
| c.4398dup                            | p.(Val1467Cysfs*12)         | Johan den Dunnen   |
| c.4520T>A                            | p.(Leu1507Gln)              | Xiaochen Qu        |
| c.4559A>G                            | p.(Lys1520Arg)              | Johan den Dunnen   |
| c.4561-2A>G                          | p.(?)                       | Martine van Belzen |
| c.4567_4568del                       | p.(Phe1523Glnfs*5)          | Martine van Belzen |
| c.4872dup                            | p.(Met1625Hisfs*35)         | Martine van Belzen |
| c.4898_4908del                       | p.(Phe1633fs)               | Johan den Dunnen   |
| c.5066T>C                            | p.(Leu1689Pro)              | VKGL-NL_Nijmegen   |
| c.5129G>A                            | p.(Cys1710Tyr)              | Johan den Dunnen   |
| c.5223_5224del                       | p.(Lys1741Asnfs*10)         | Johan den Dunnen   |
| c.5641_5642del                       | p.(Leu1882Alafs*83)         | Martine van Belzen |
| c.5710C>T                            | p.(Gln1904*)                | Martine van Belzen |
| c.5821C>T                            | p.(Gln1941*)                | Martine van Belzen |
| c.5843C>T                            | p.(Pro1948Leu)              | Xiaochen Qu        |
| c.6213del                            | p.(Arg2072Glyfs*3)          | Martine van Belzen |
| c.6324C>G                            | p.(Tyr2108*)                | VKGL-NL_VUmc       |
| c.6436C>T                            | p.(Gln2146*)                | Martine van Belzen |
| c.6670_6671dup                       | p.(Met2225Alafs*78)         | Johan den Dunnen   |

**EP300 mutations: 8**

| Nucleotide | Protein             | Reference        |
|------------|---------------------|------------------|
| c.187C>T   | p.(Gln63*)          | VKGL-NL_Nijmegen |
| c.598C>T   | p.(Arg200*)         | VKGL-NL_Nijmegen |
| c.2182del  | p.(Arg728Glyfs*48)  | VKGL-NL_Rot*dam  |
| c.3262del  | p.(Asp1088Ilefs*6)  | VKGL-NL_Rot*dam  |
| c.3685G>T  | p.(Glu1229*)        | IMGAG            |
| c.3949G>T  | p.(Glu1317*)        | VKGL-NL_VUmc     |
| c.4875dup  | p.(Gly1626Trpfs*47) | IMGAG            |
| c.5973dup  | p.(Gln1992Thrfs*81) | IMGAG            |
